# Supplementary material for: Synthesis of Novel 3-Deoxy-3-thio Derivatives of d-Glucosamine and Their Application as Ligands for the Enantioselective Addition of Diethylzinc to Benzaldehyde
Source: MDPI journal article supplement (doi:10.3390/ijms25105542), 2024-05-19
Supplement: s1 [file s1]

## **SUPPLEMENTARY MATERIAL**

### **Synthesis of novel 3-deoxy-3-thio derivatives of D-glucosamine and their application as ligands for the enantioselective addition of diethylzinc to benzaldehyde.**

#### **Authors**

Yusuf Zaim Hakim, Tomasz Bauer\*

Faculty of Chemistry, University of Warsaw, L. Pasteura 1, PL-02-093 Warsaw, Poland

\* Correspondence: [tbauer@chem.uw.edu.pl](mailto:tbauer@chem.uw.edu.pl)

#### **Content**

1.  $^1\text{H}$  NMR and  $^{13}\text{C}$  NMR spectra of synthesized compounds

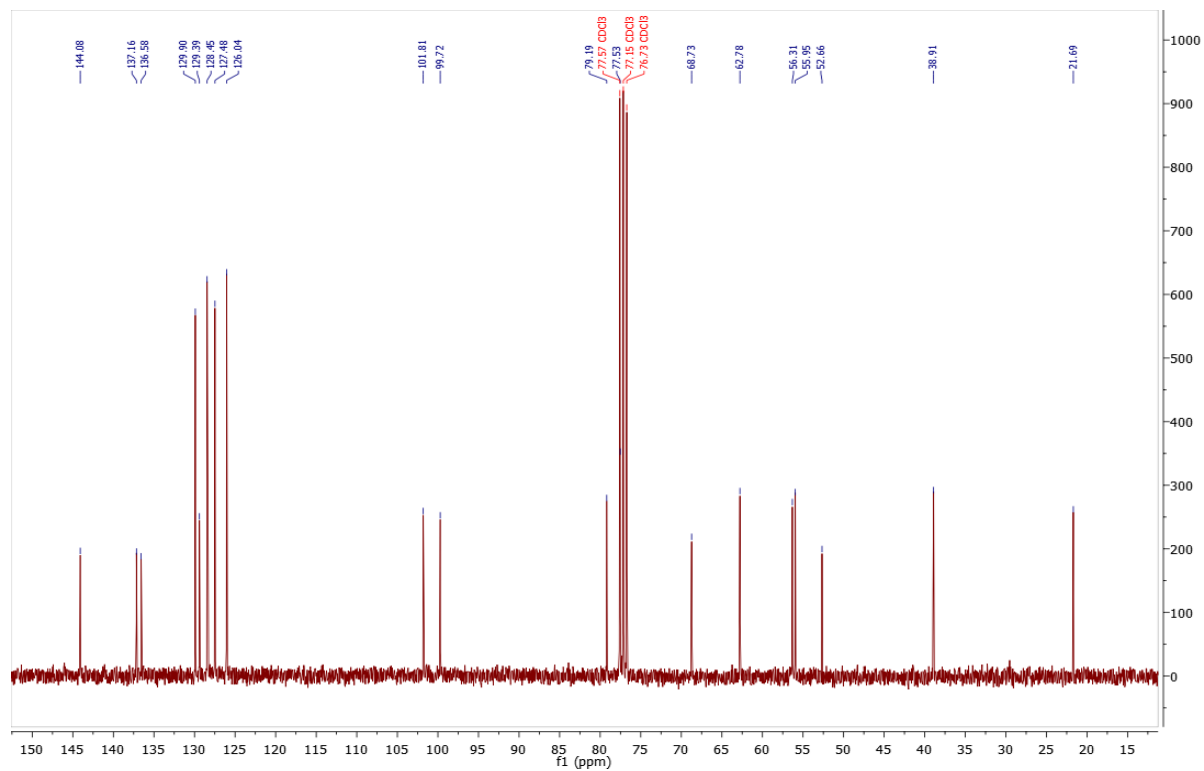

**Fig. S1.**  $^1\text{H}$  NMR and  $^{13}\text{C}$  NMR Spectrum of Compound **6**

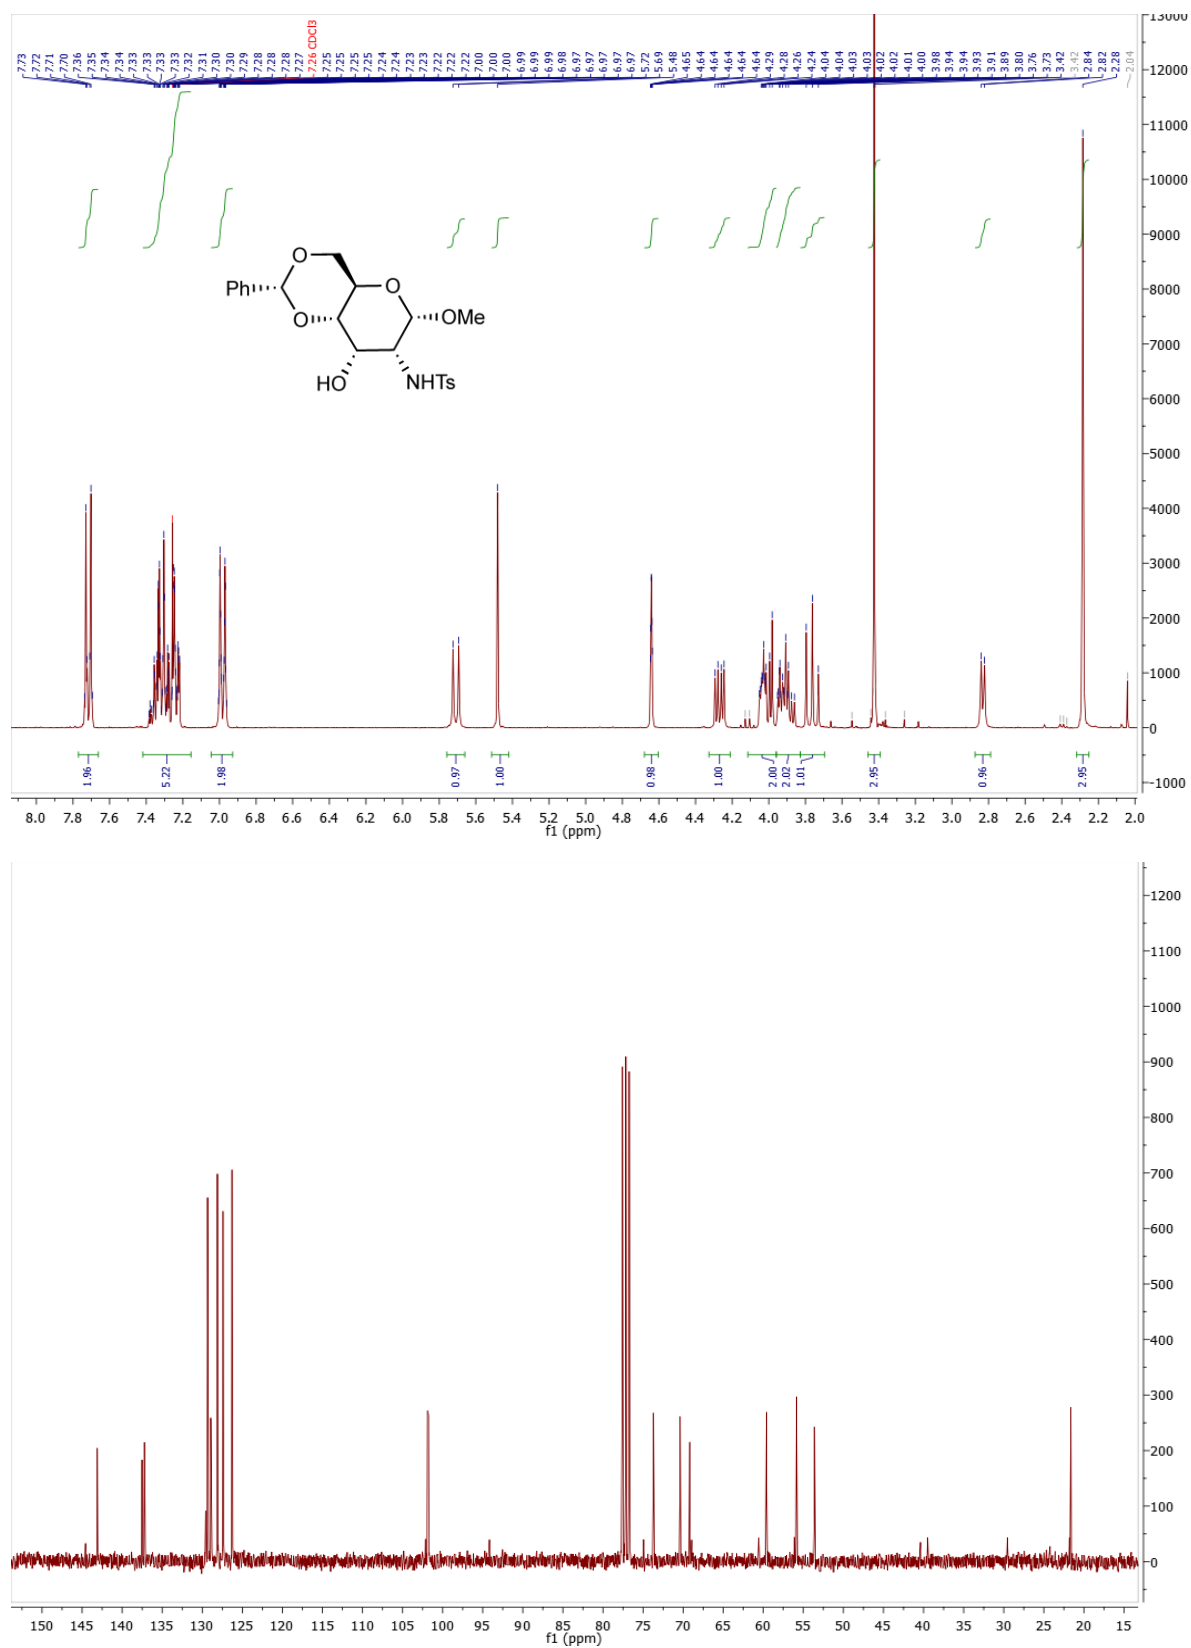

**Fig. S2.**  $^1\text{H}$  NMR and  $^{13}\text{C}$  NMR Spectrum of Compound 7

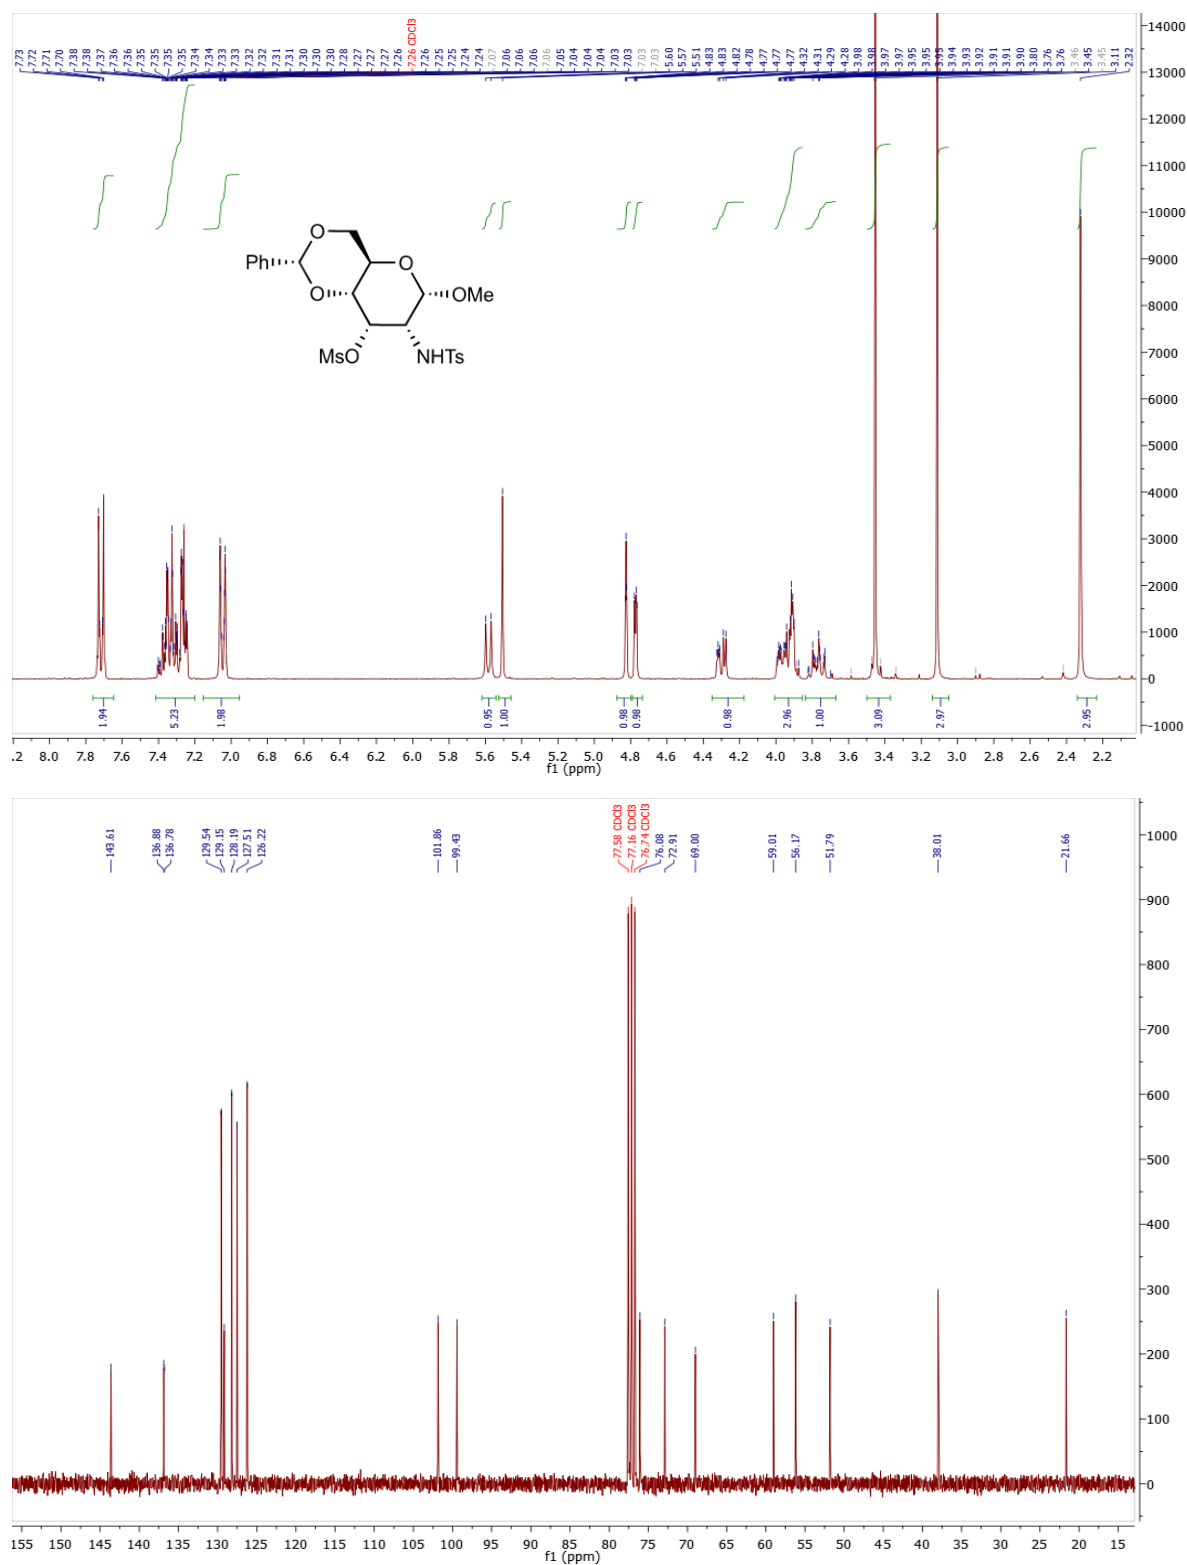

**Fig. S3.** <sup>1</sup>H NMR and <sup>13</sup>C NMR Spectrum of Compound **8**

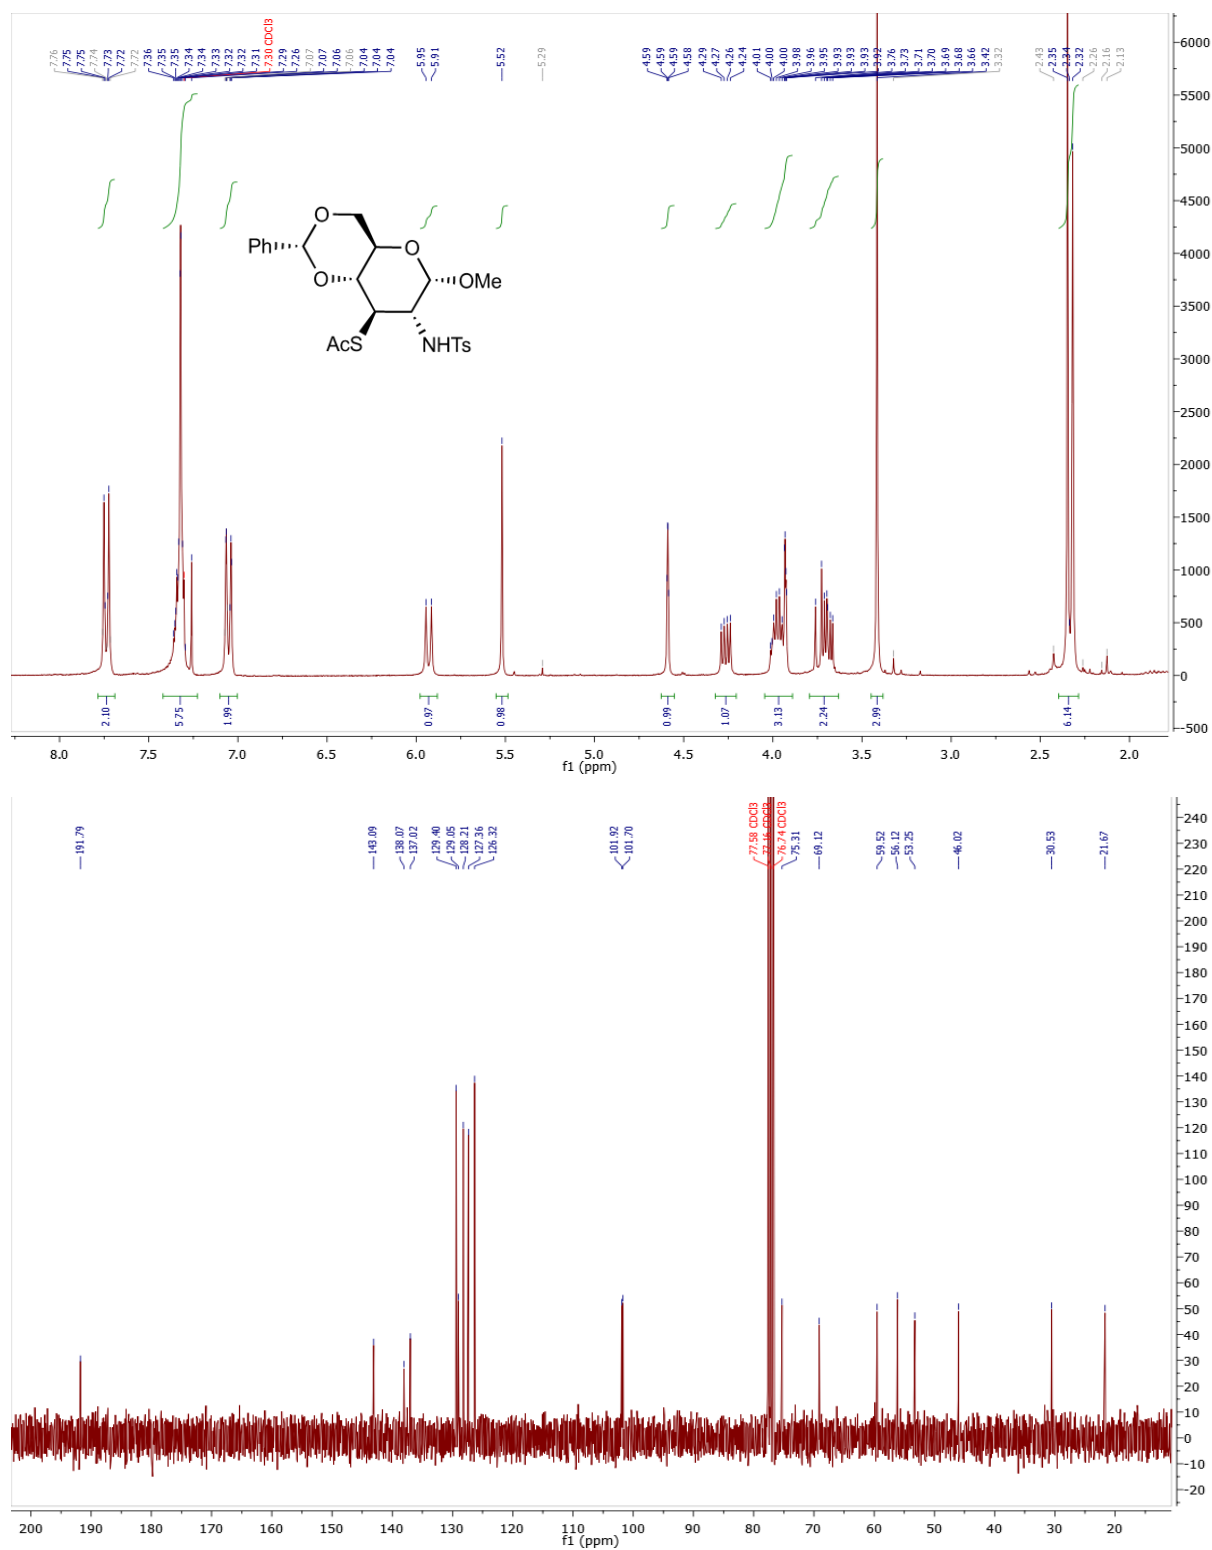

**Fig. S4.** <sup>1</sup>H NMR and <sup>13</sup>C NMR Spectrum of Compound **9**

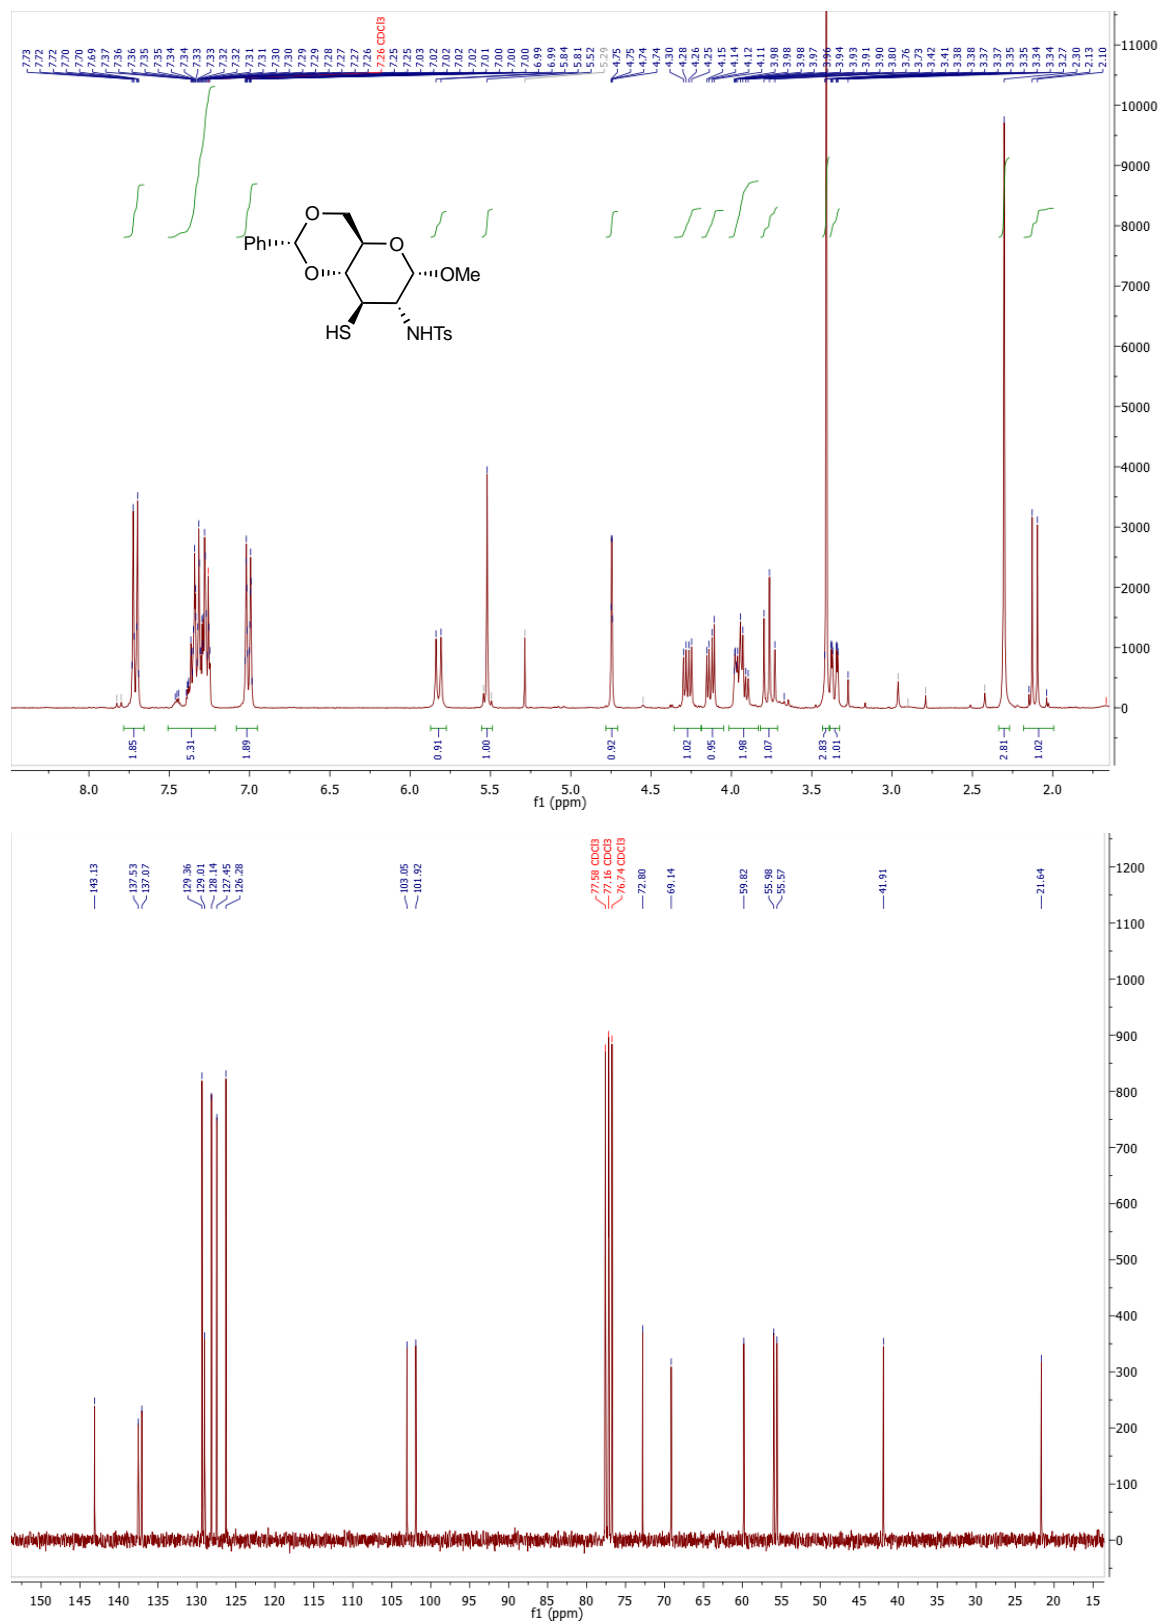

**Fig. S5.** <sup>1</sup>H NMR and <sup>13</sup>C NMR Spectrum of Compound **10**

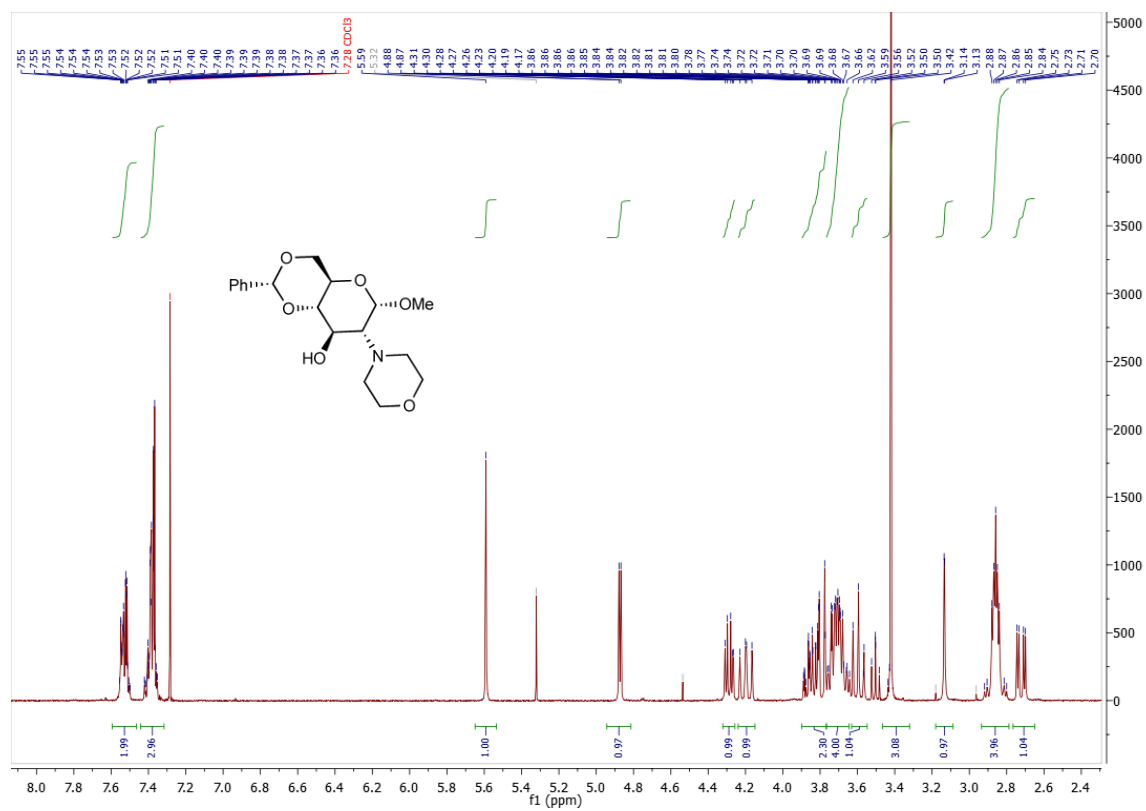

**Fig. S6.** <sup>1</sup>H NMR Spectrum of Compound **11**



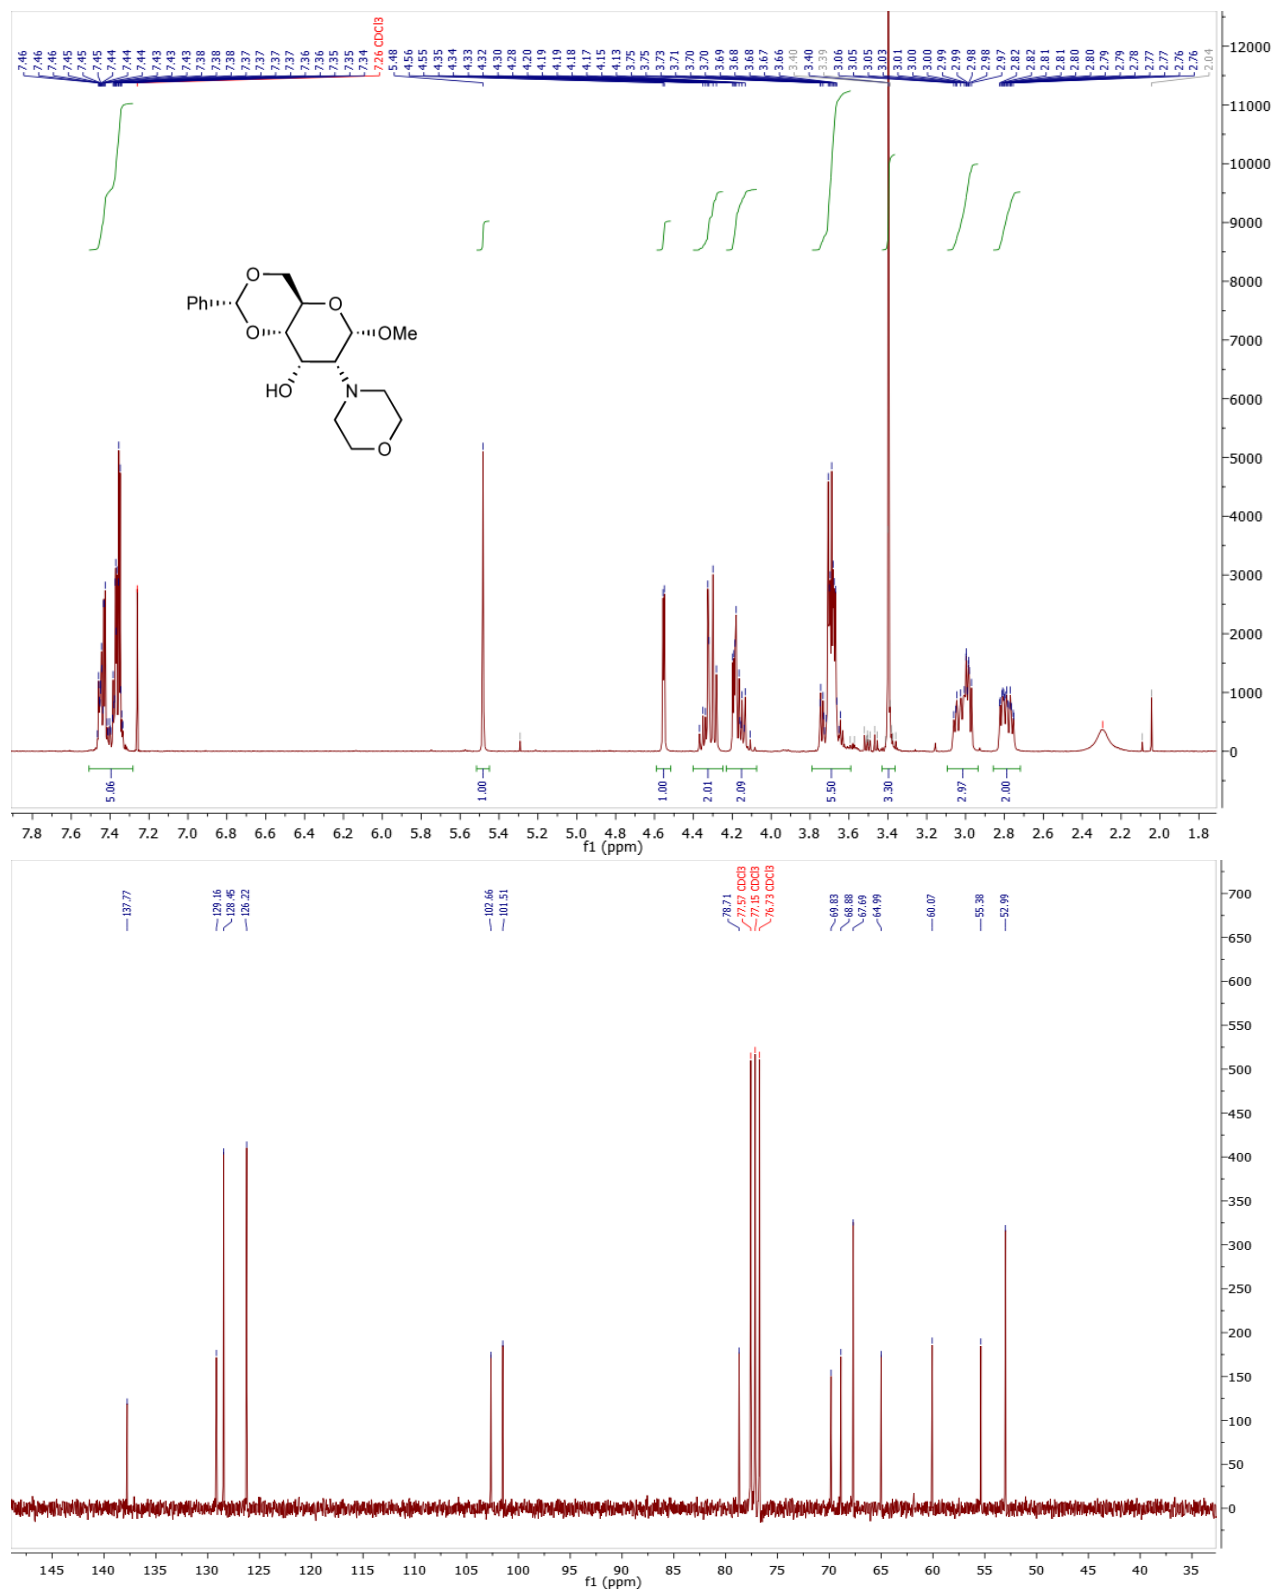

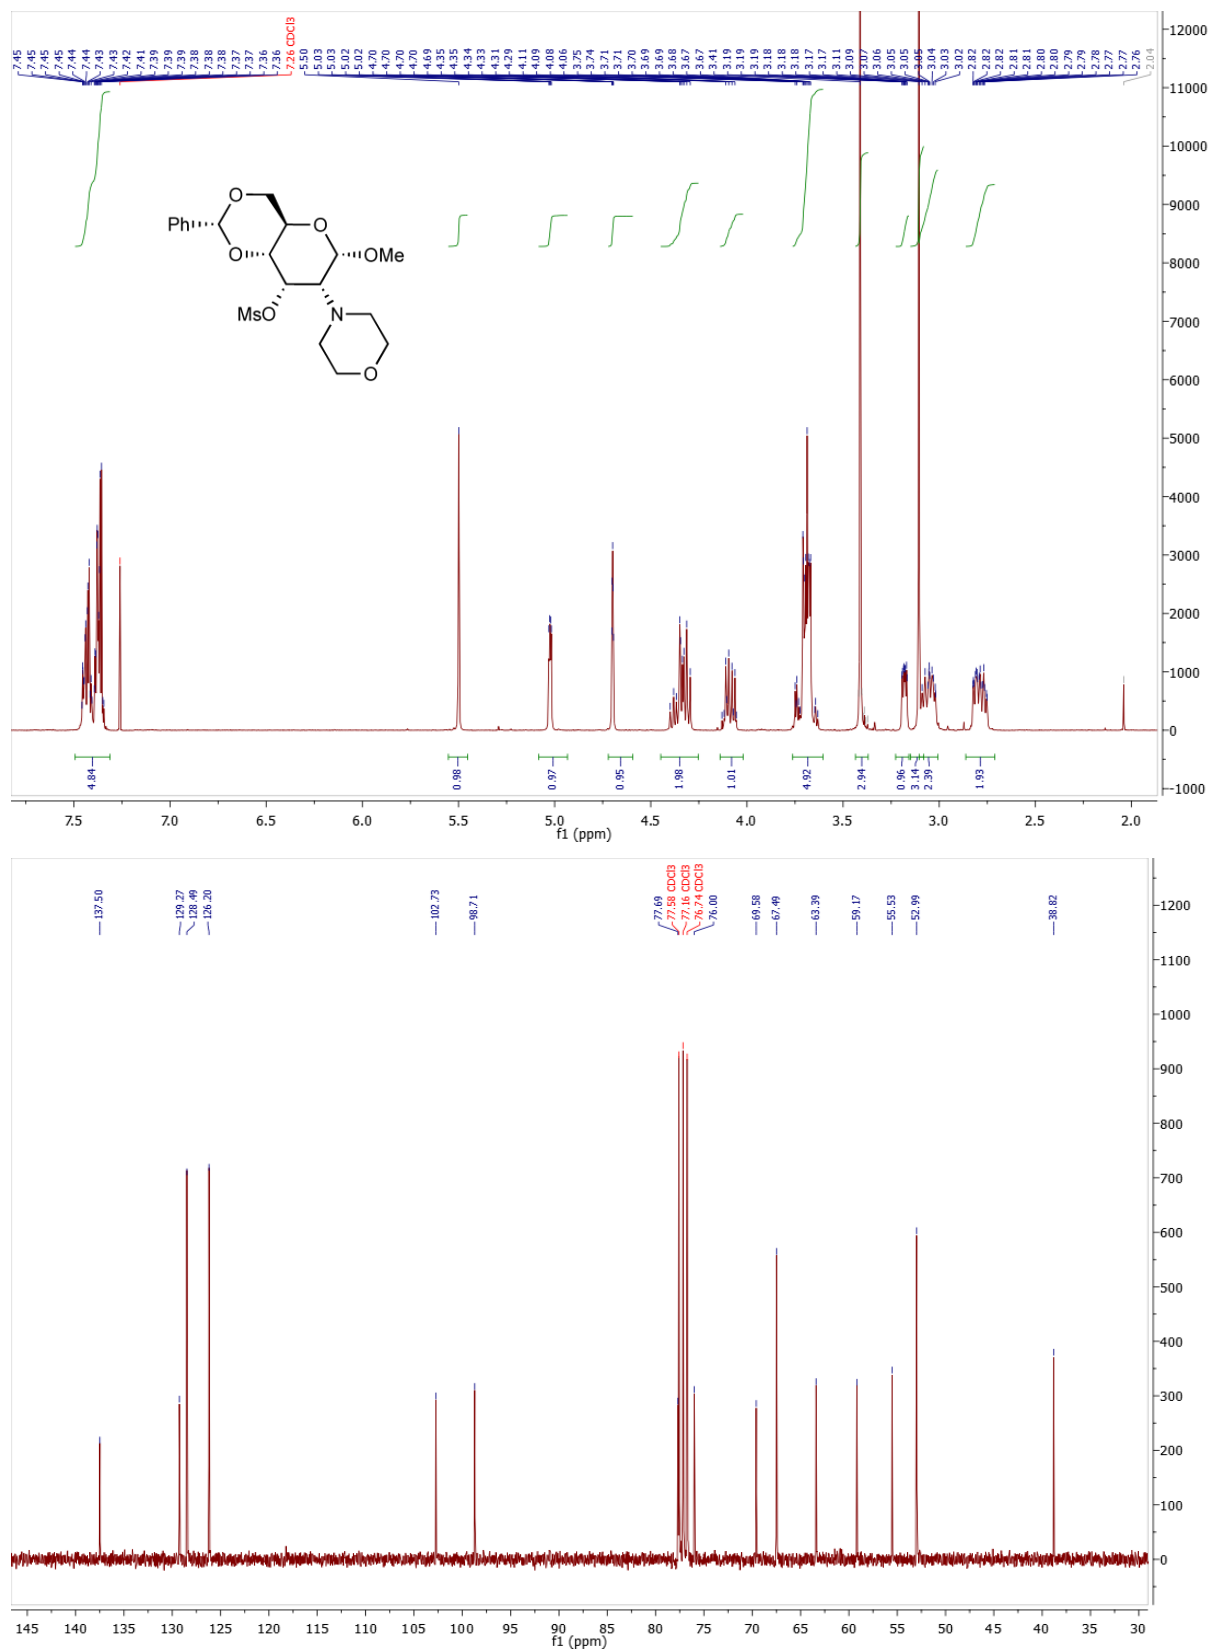

**Fig. S9.** <sup>1</sup>H NMR and <sup>13</sup>C NMR Spectrum of Compound 14

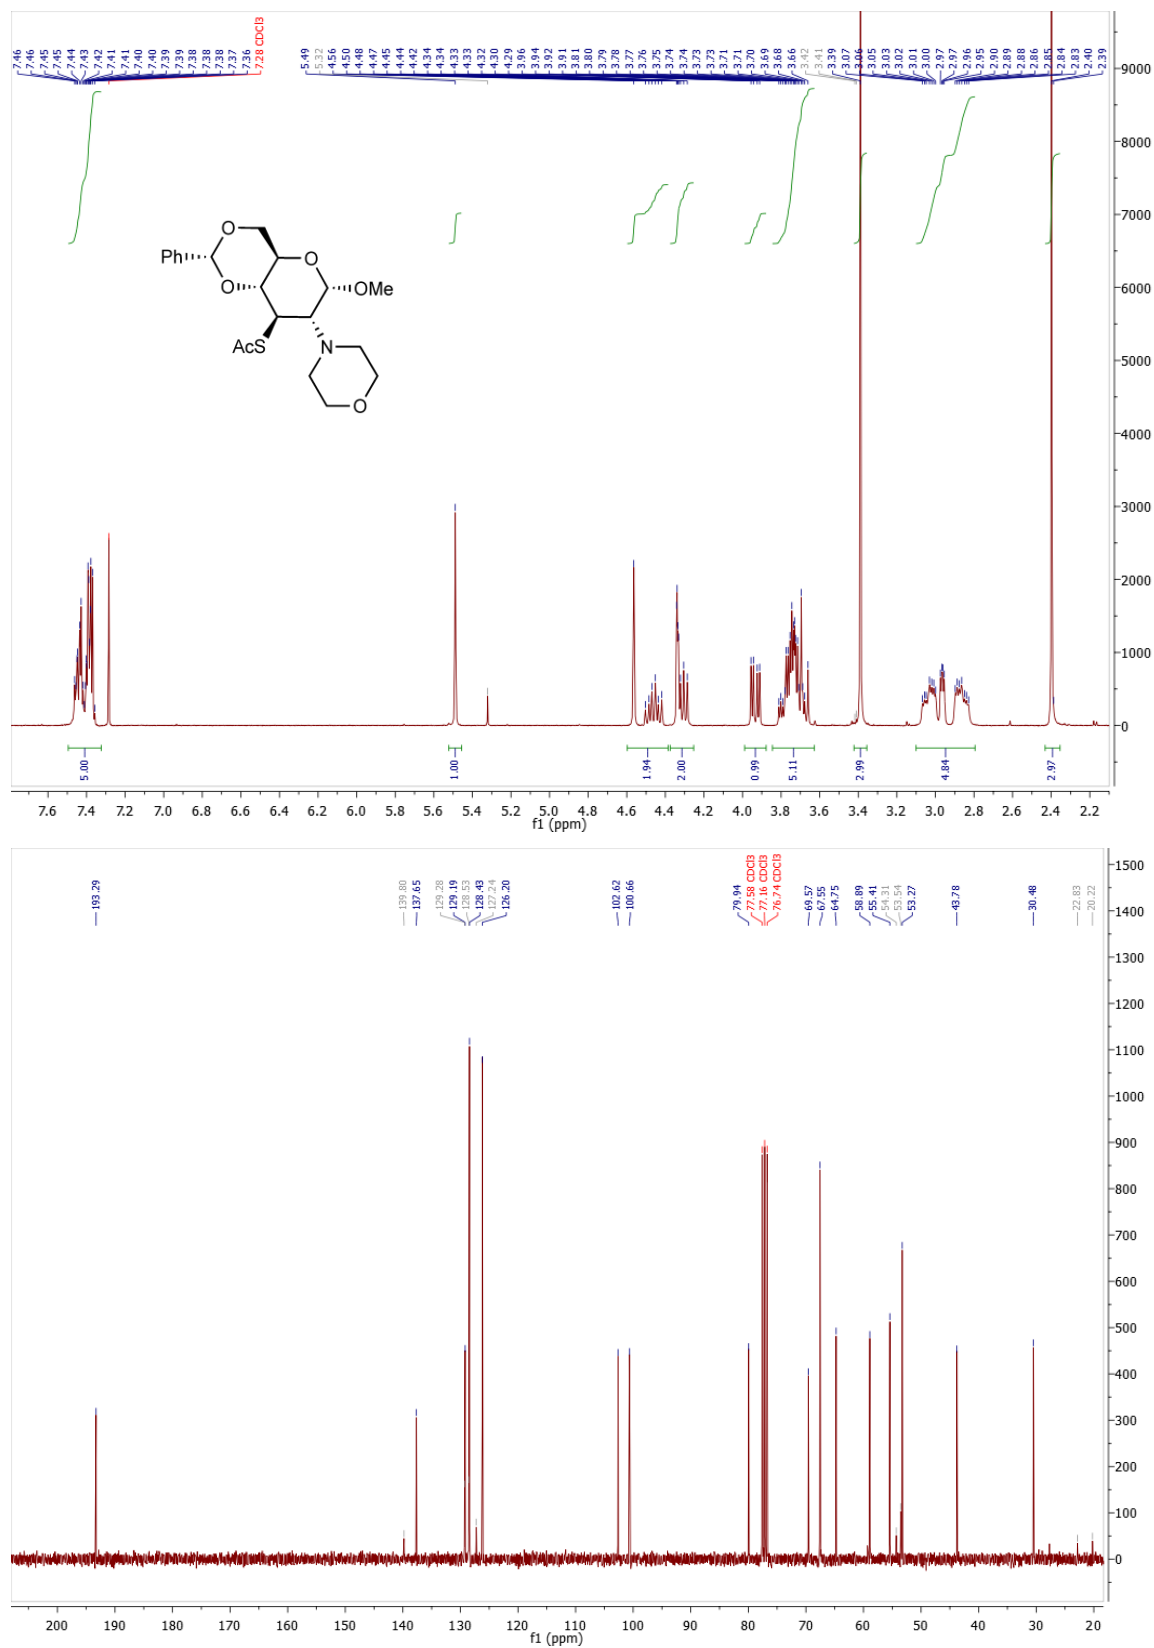

**Fig. S10.** <sup>1</sup>H NMR and <sup>13</sup>C NMR Spectrum of Compound **15**

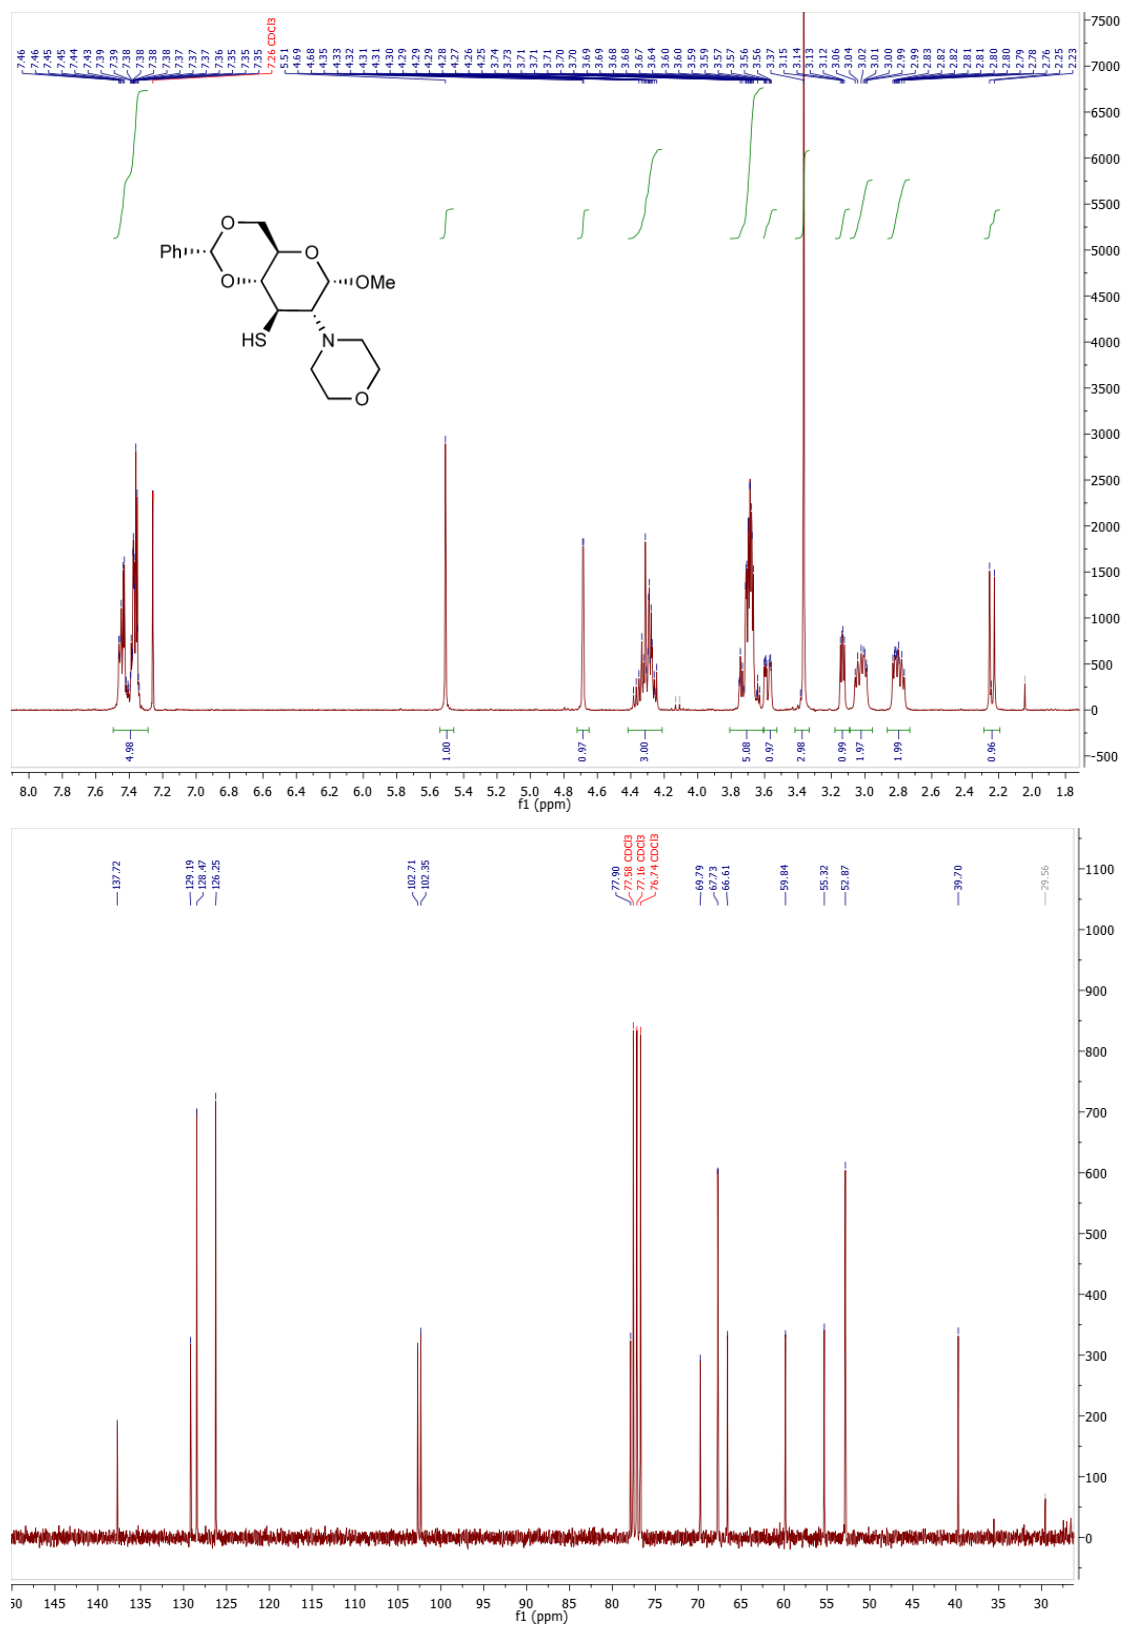

**Fig. S11.** <sup>1</sup>H NMR and <sup>13</sup>C NMR Spectrum of Compound 16

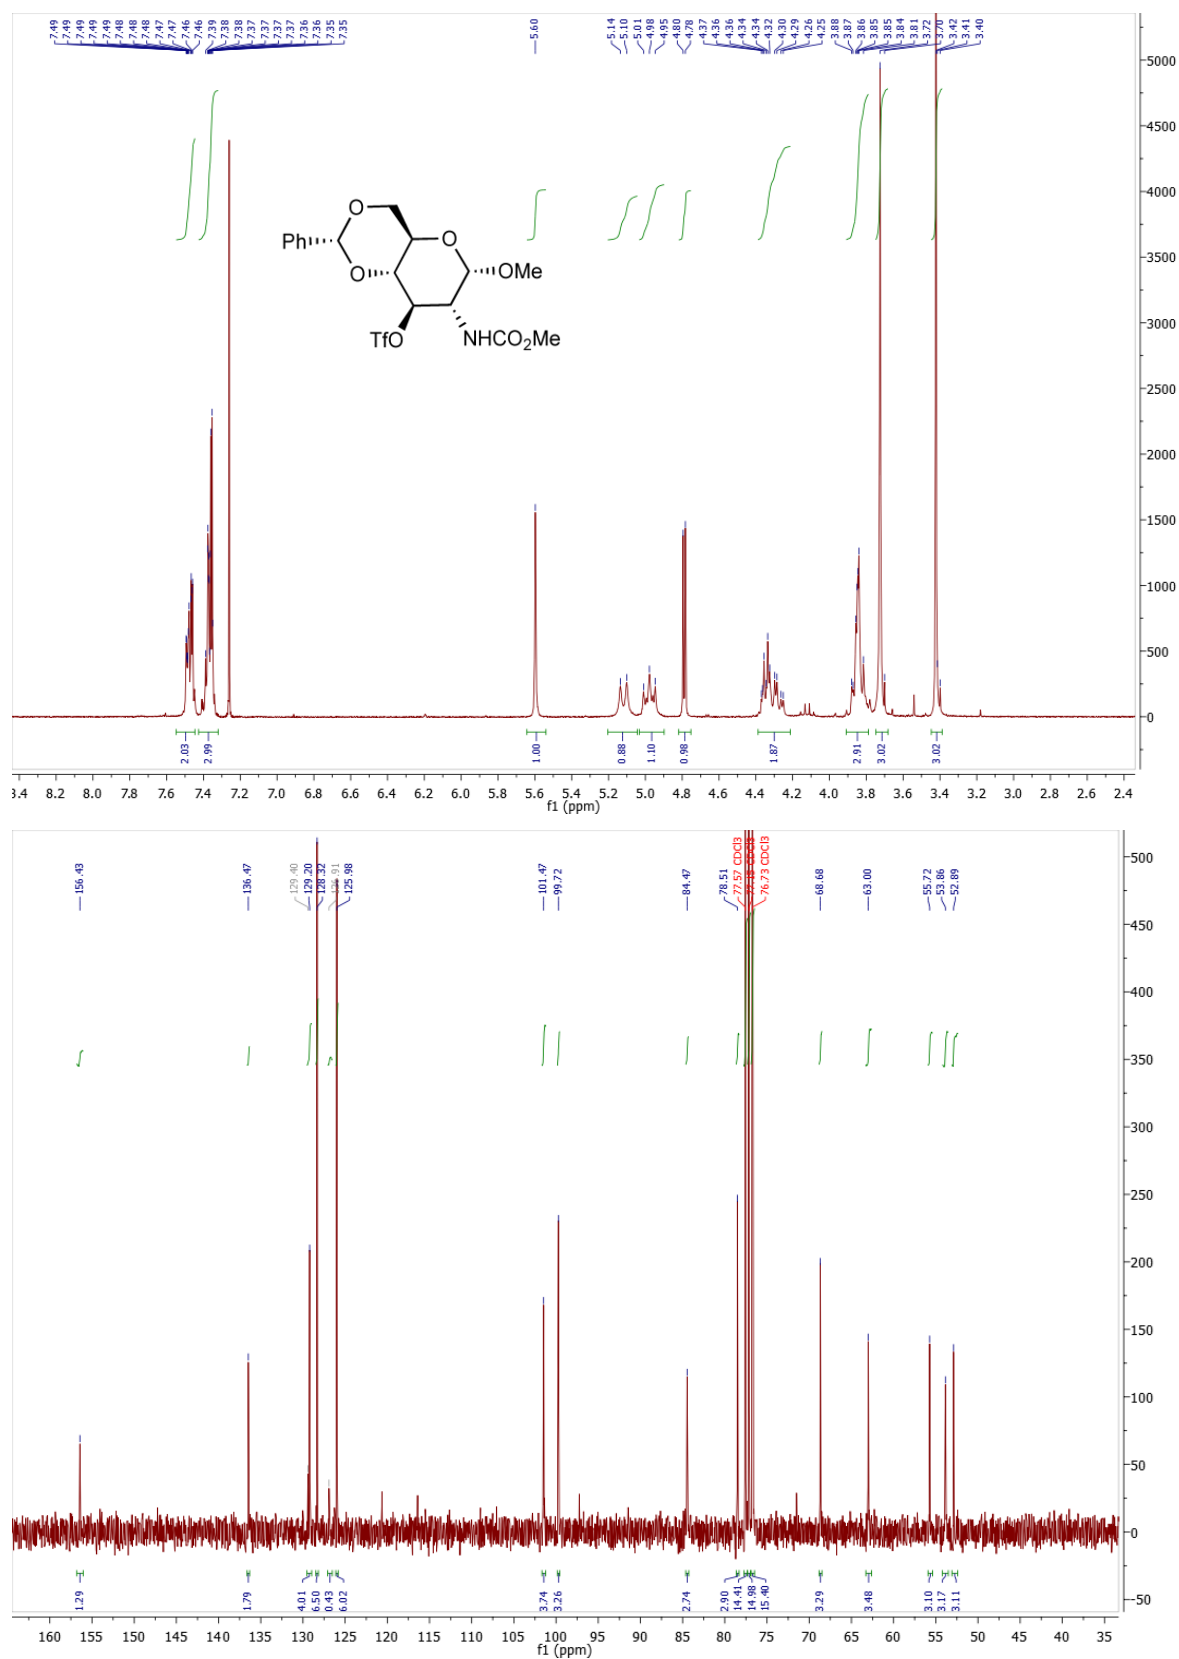

**Fig. S12.** <sup>1</sup>H NMR and <sup>13</sup>C NMR Spectrum of Compound 18

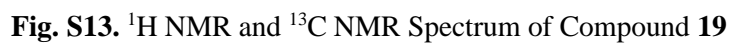

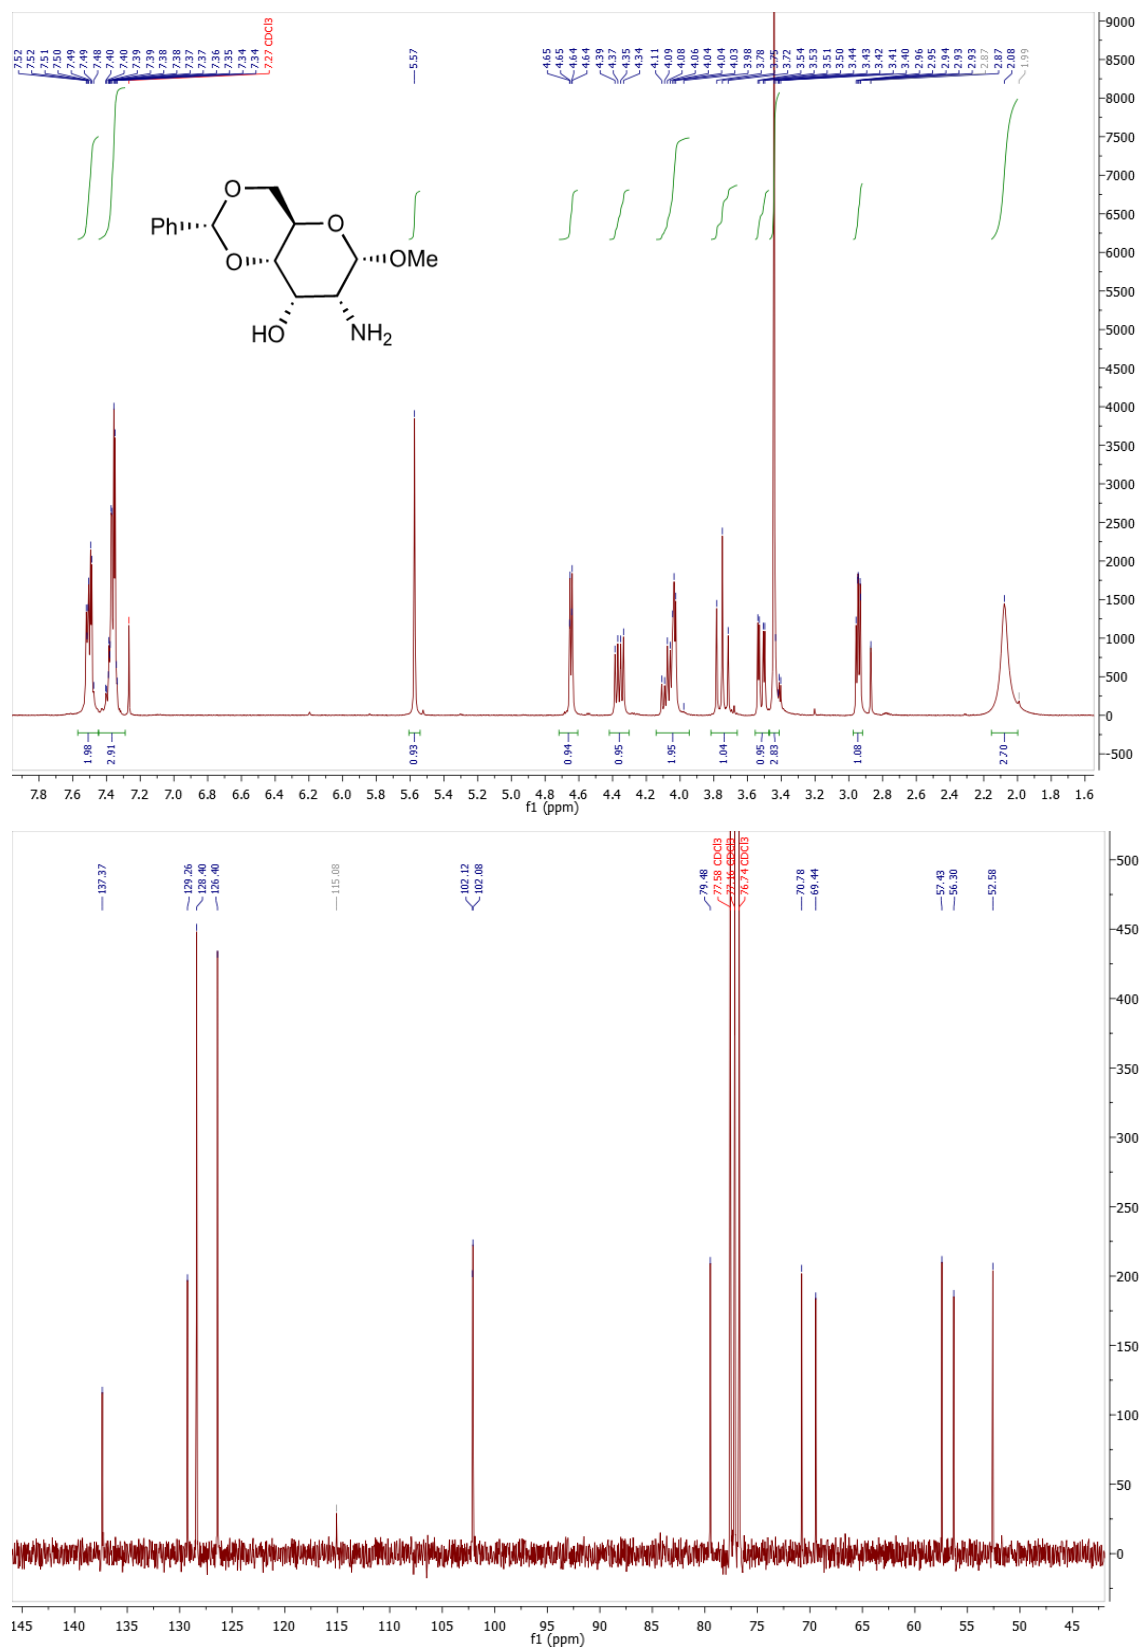

**Fig. S14.** <sup>1</sup>H NMR and <sup>13</sup>C NMR Spectrum of Compound 20



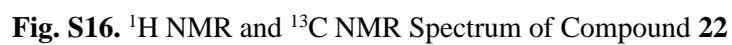

**Fig. S16.**  $^1\text{H}$  NMR and  $^{13}\text{C}$  NMR Spectrum of Compound **22**



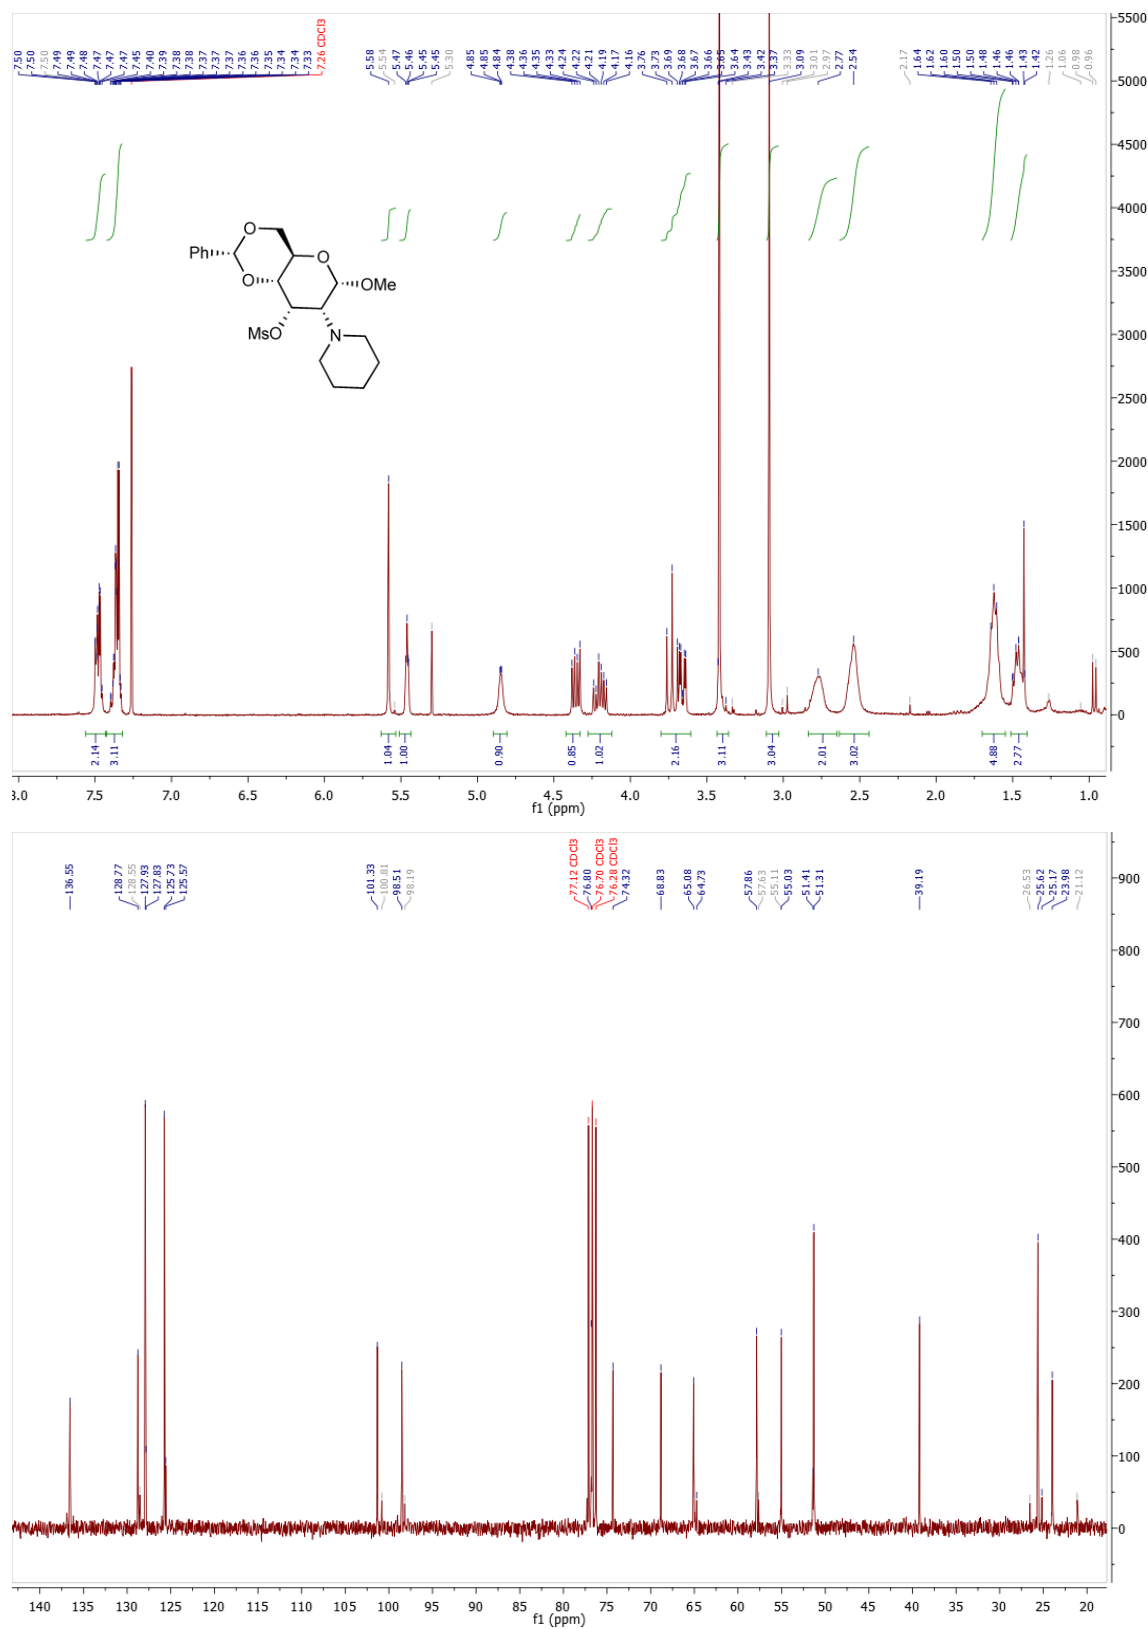

**Fig. S18.** <sup>1</sup>H NMR and <sup>13</sup>C NMR Spectrum of Compound **24**

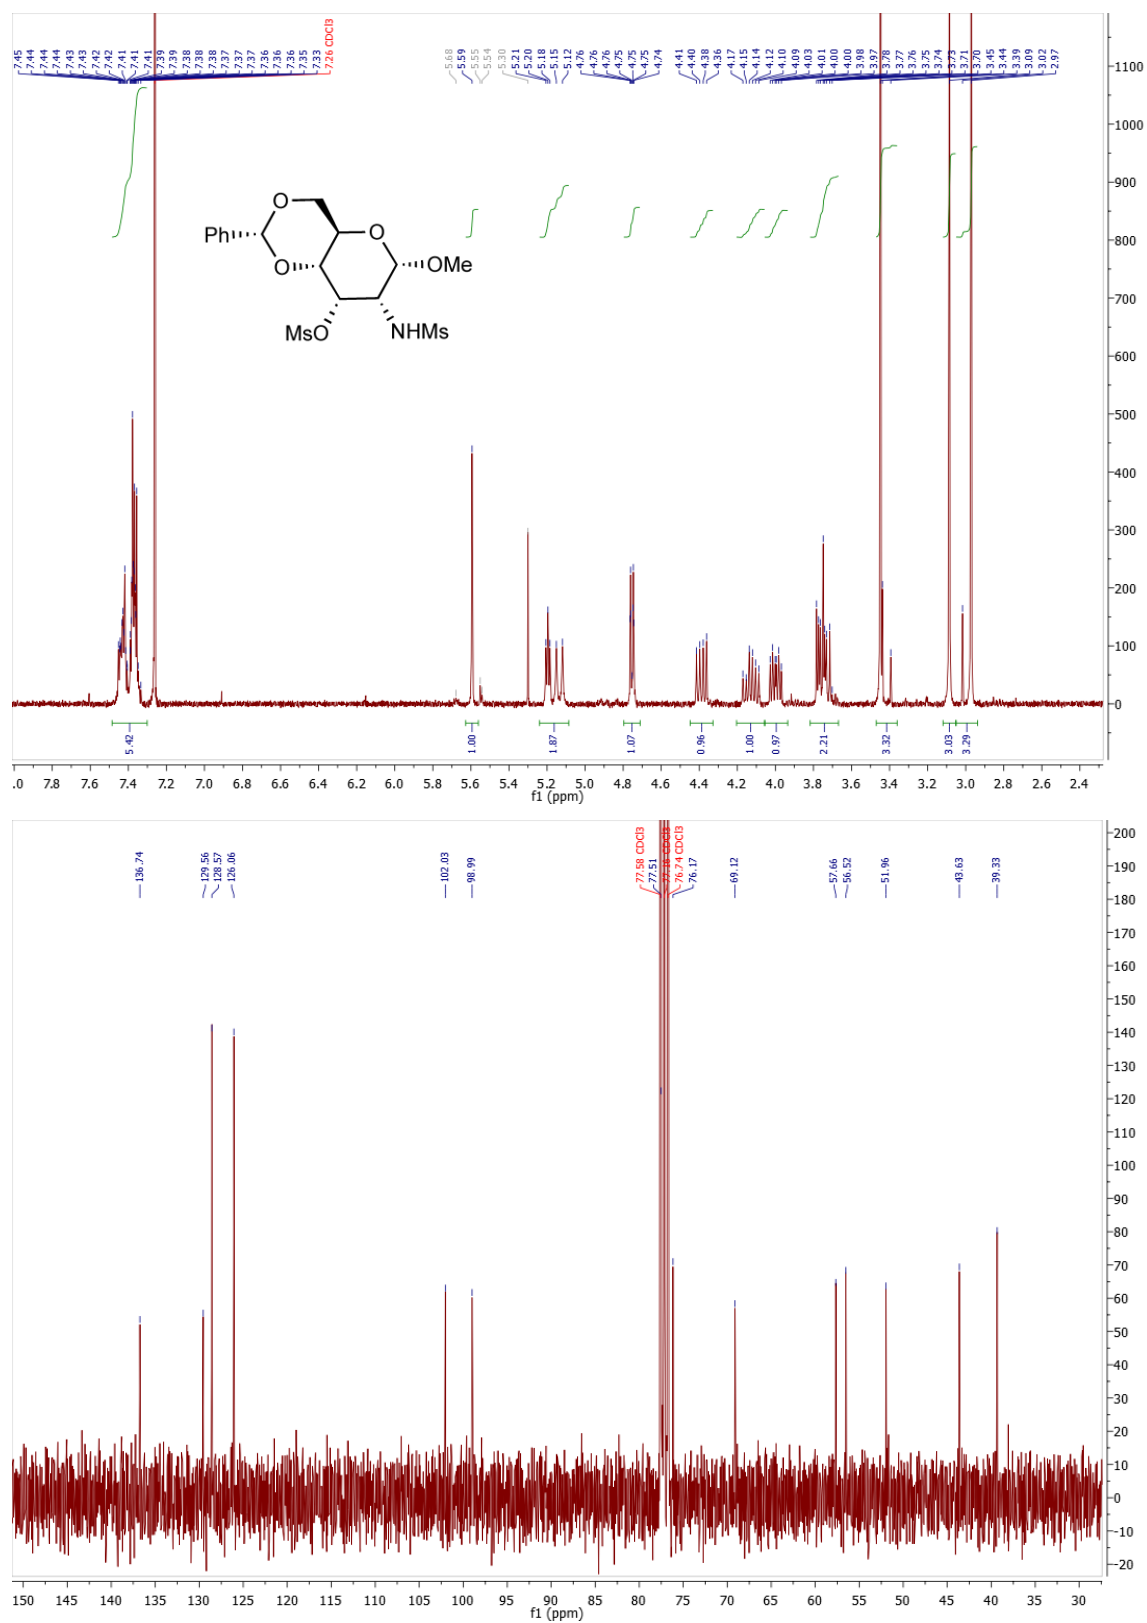

**Fig. S19.** <sup>1</sup>H NMR and <sup>13</sup>C NMR Spectrum of Compound **25**

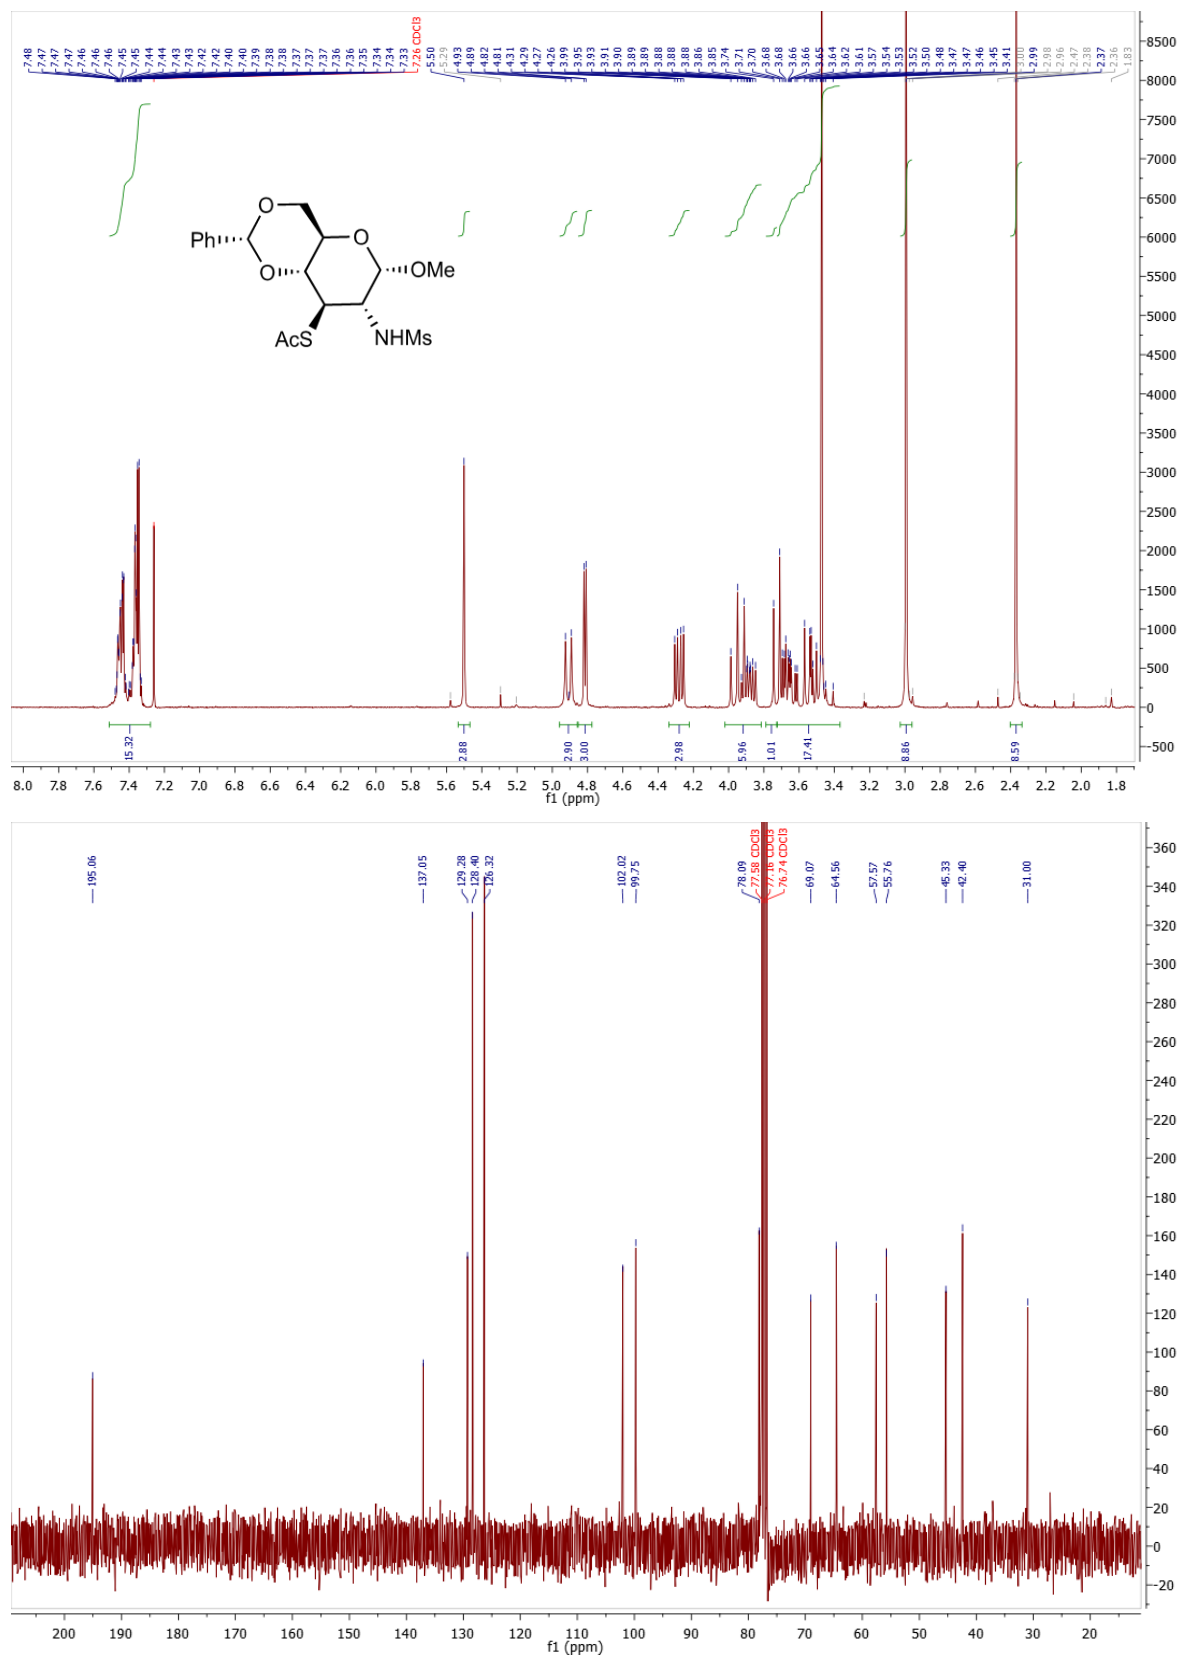

**Fig. S20.** <sup>1</sup>H NMR and <sup>13</sup>C NMR Spectrum of Compound **26**

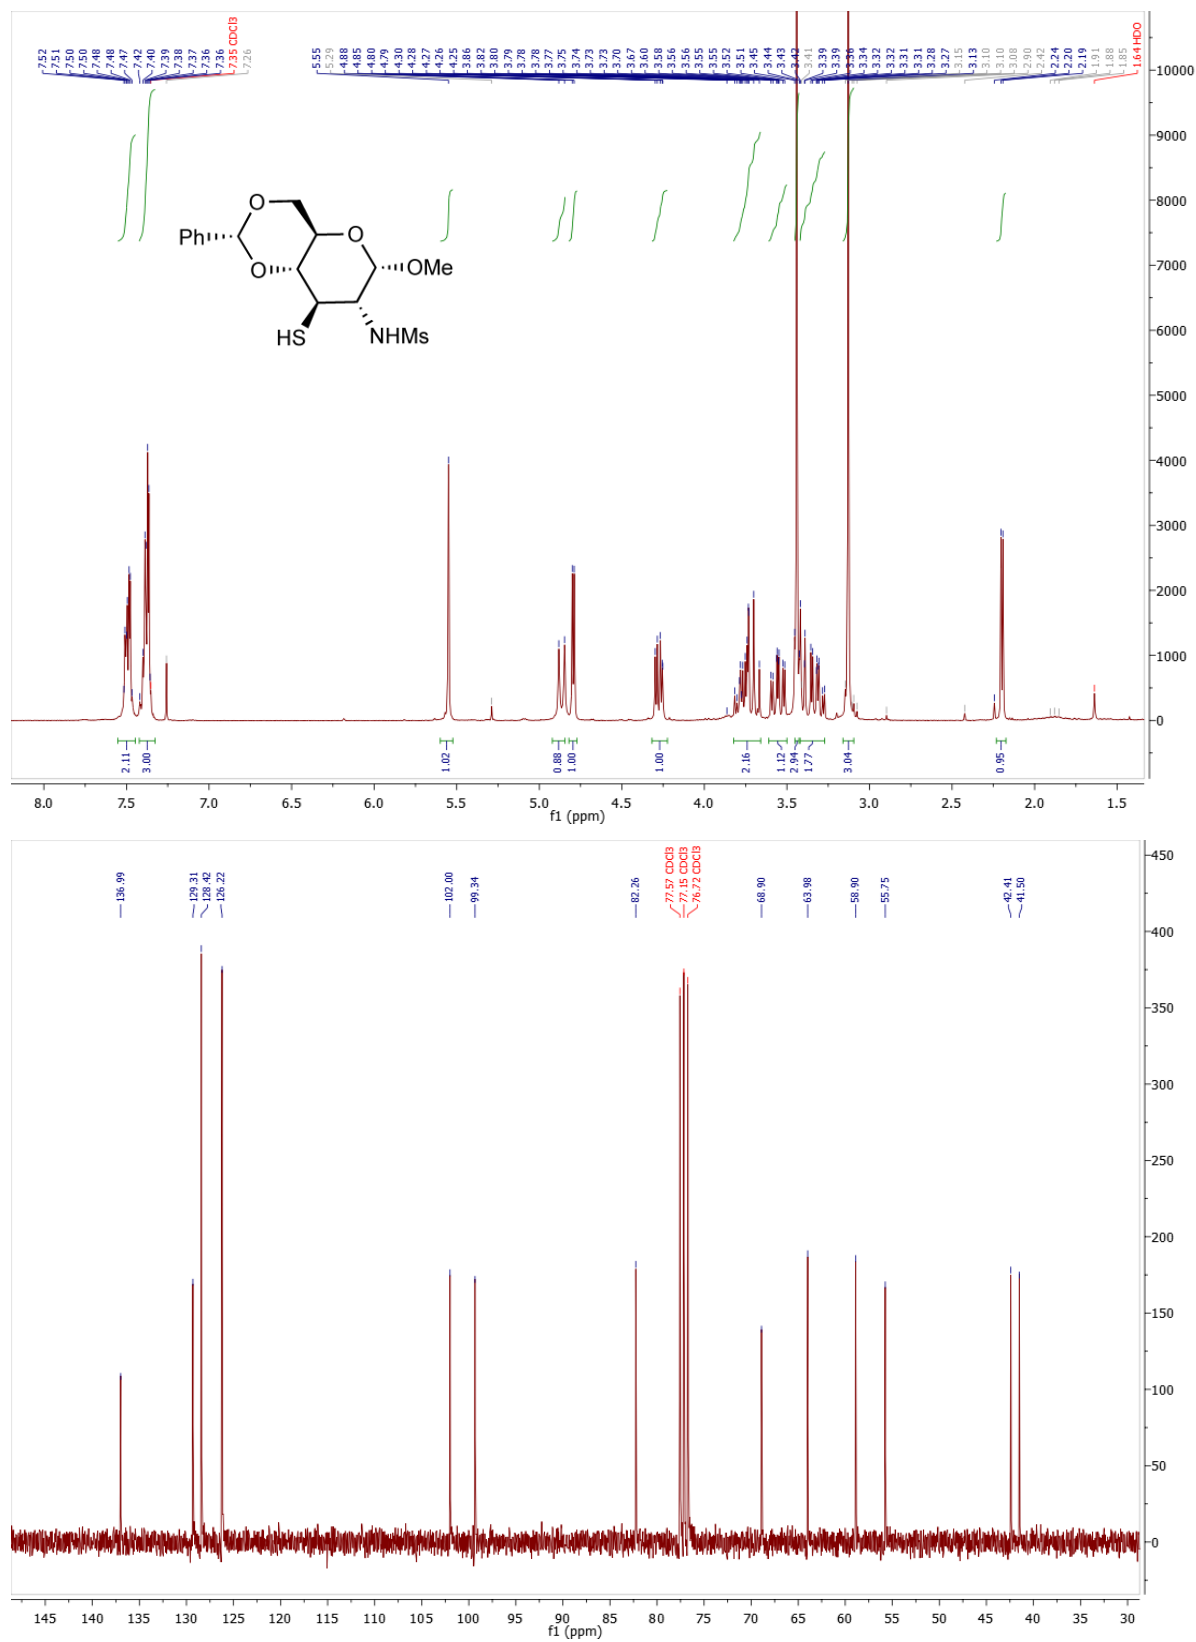

**Fig. S21.** <sup>1</sup>H NMR and <sup>13</sup>C NMR Spectrum of Compound **27**

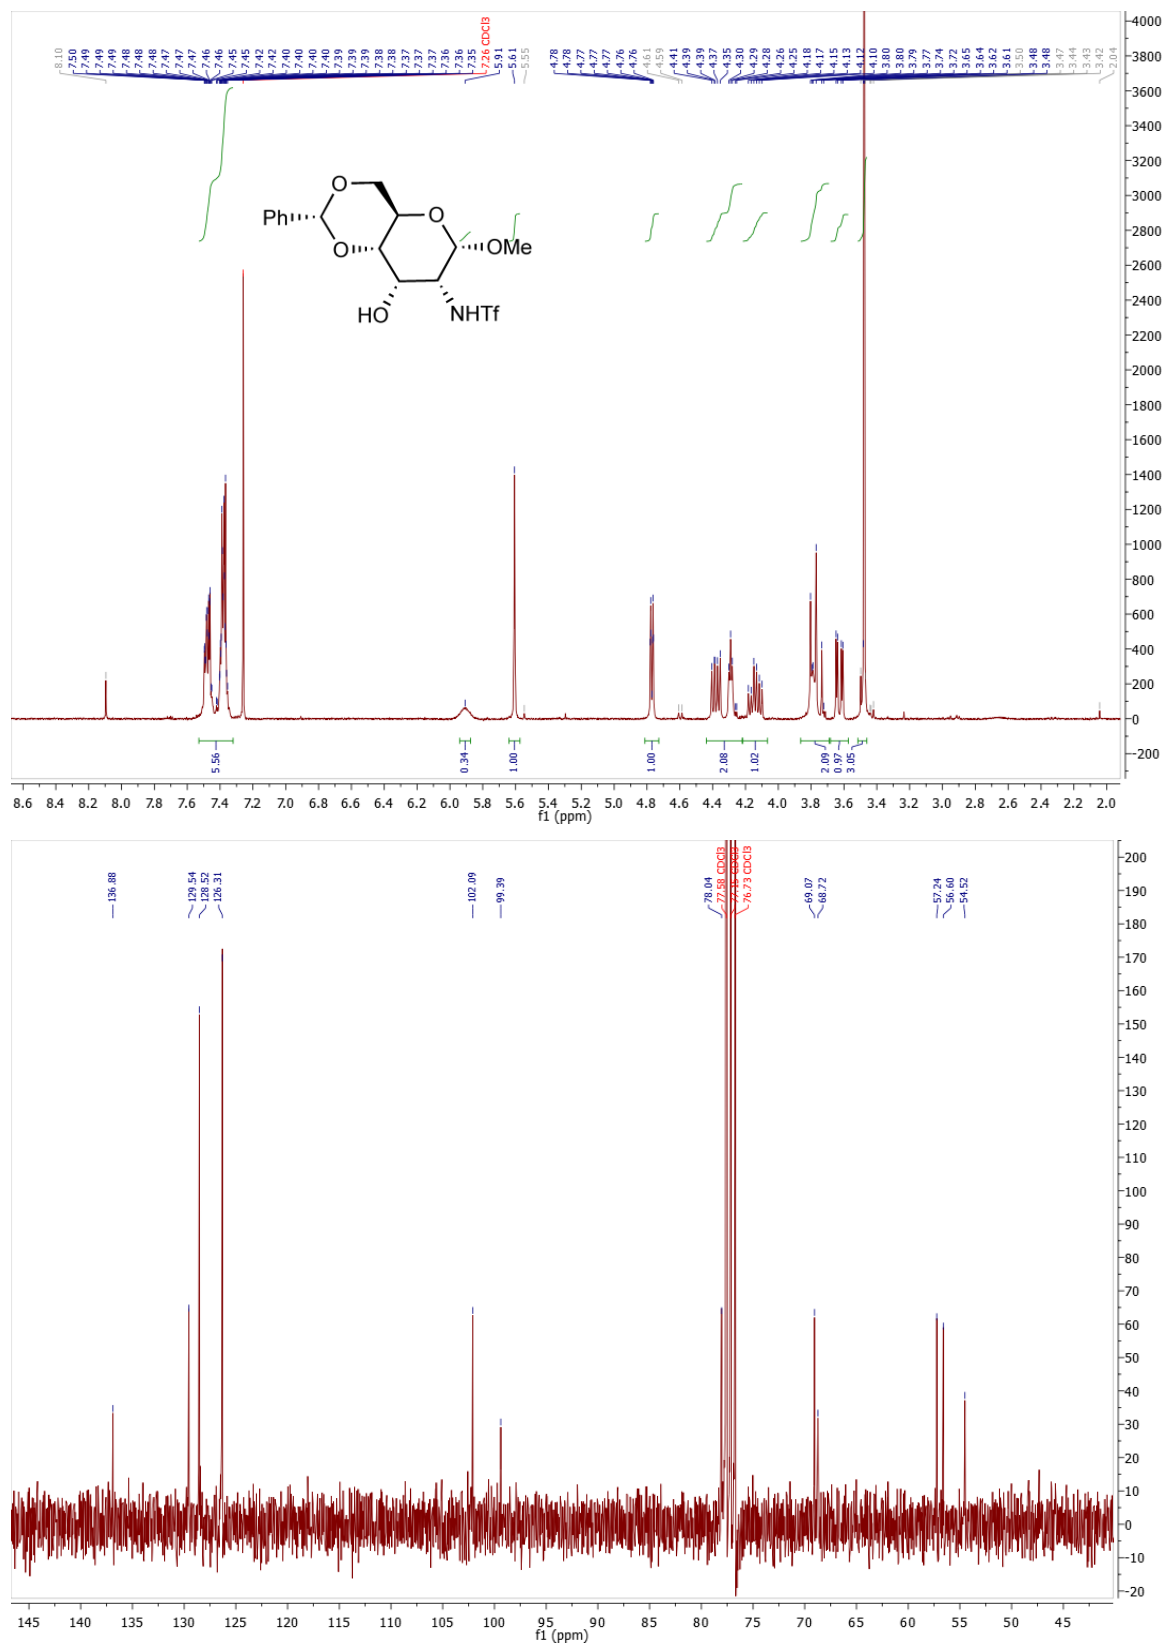

**Fig. S22.** <sup>1</sup>H NMR and <sup>13</sup>C NMR Spectrum of Compound **28**

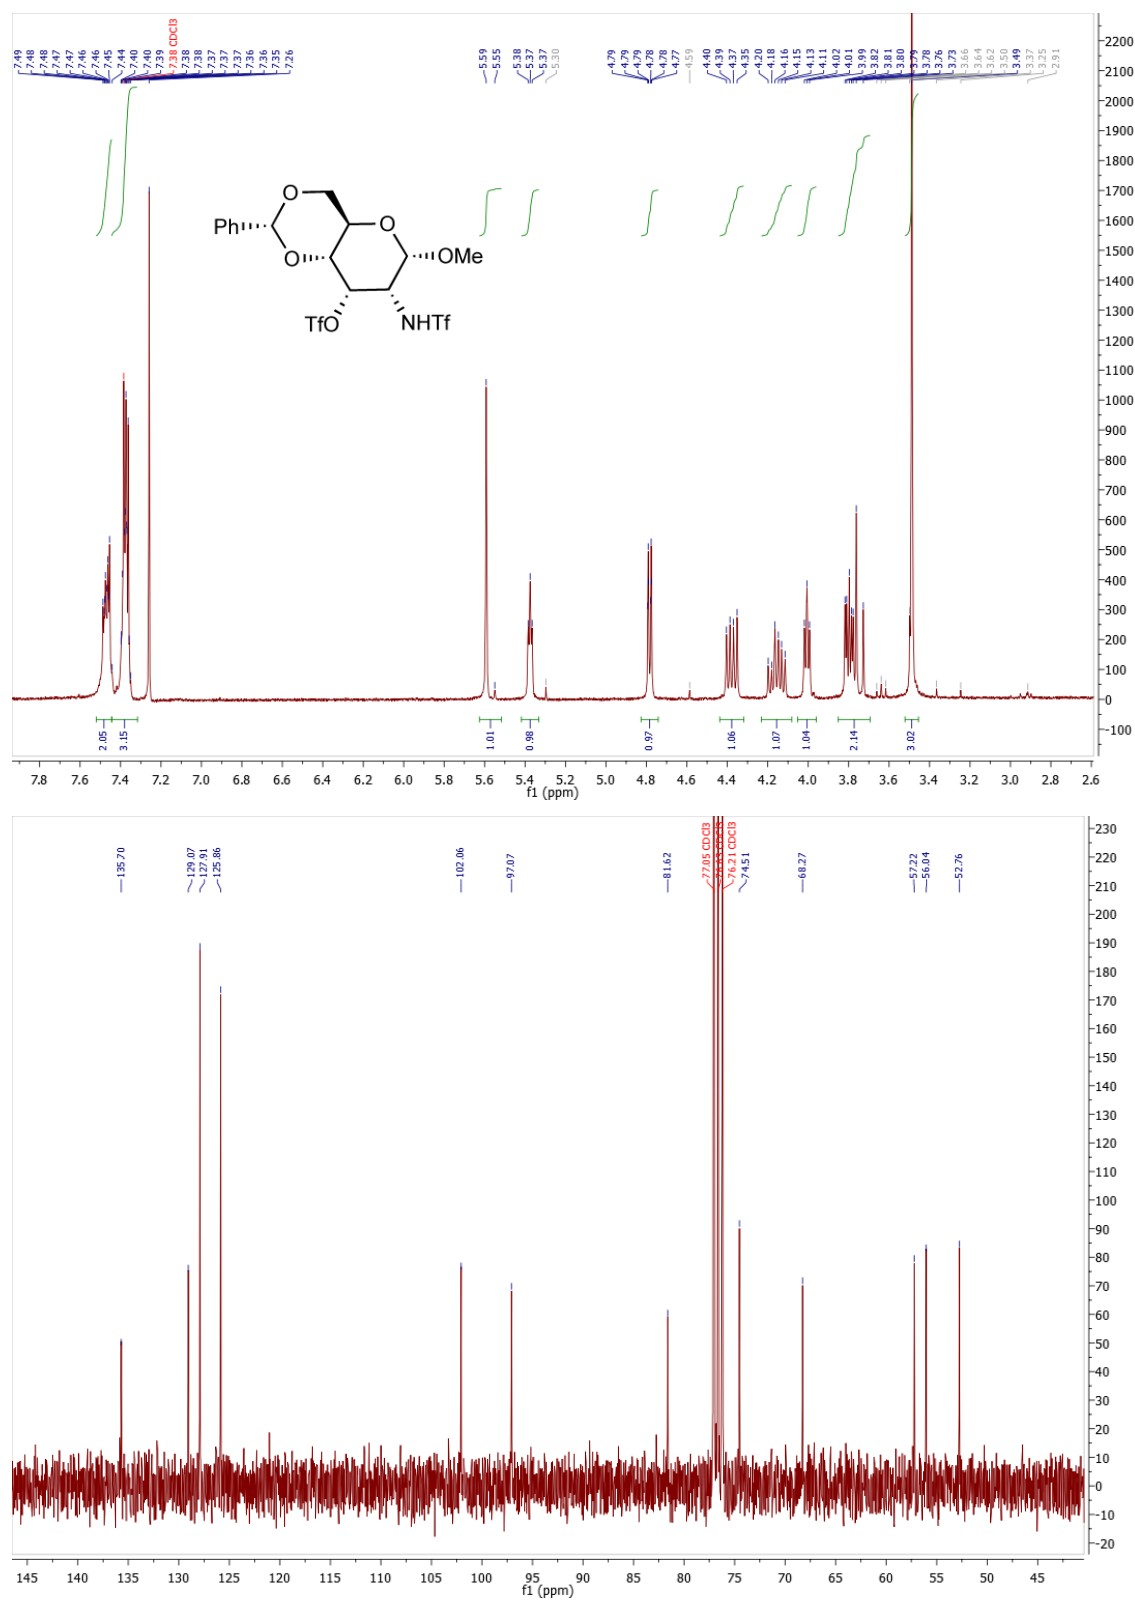

**Fig. S23.** <sup>1</sup>H NMR and <sup>13</sup>C NMR Spectrum of Compound 29

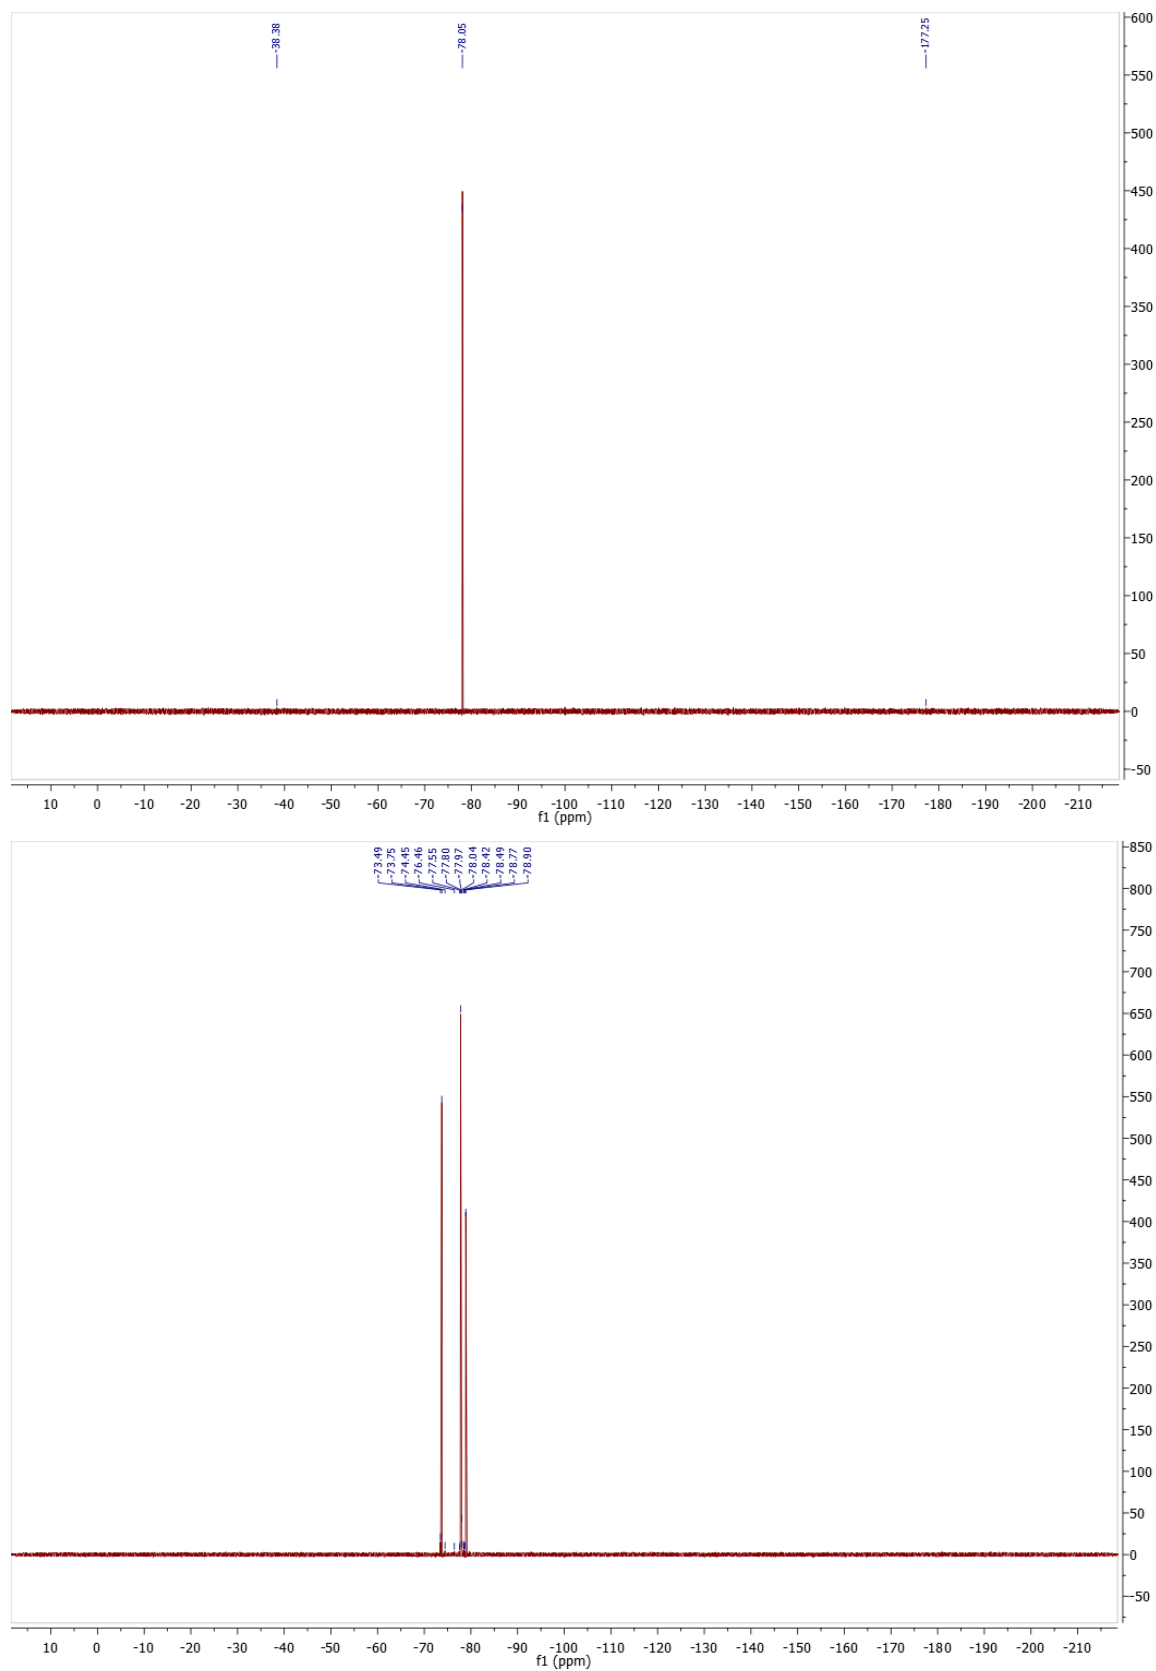

**Fig. S24.**  $^{19}\text{F}$  NMR Spectrum of Compound **28** & **29**

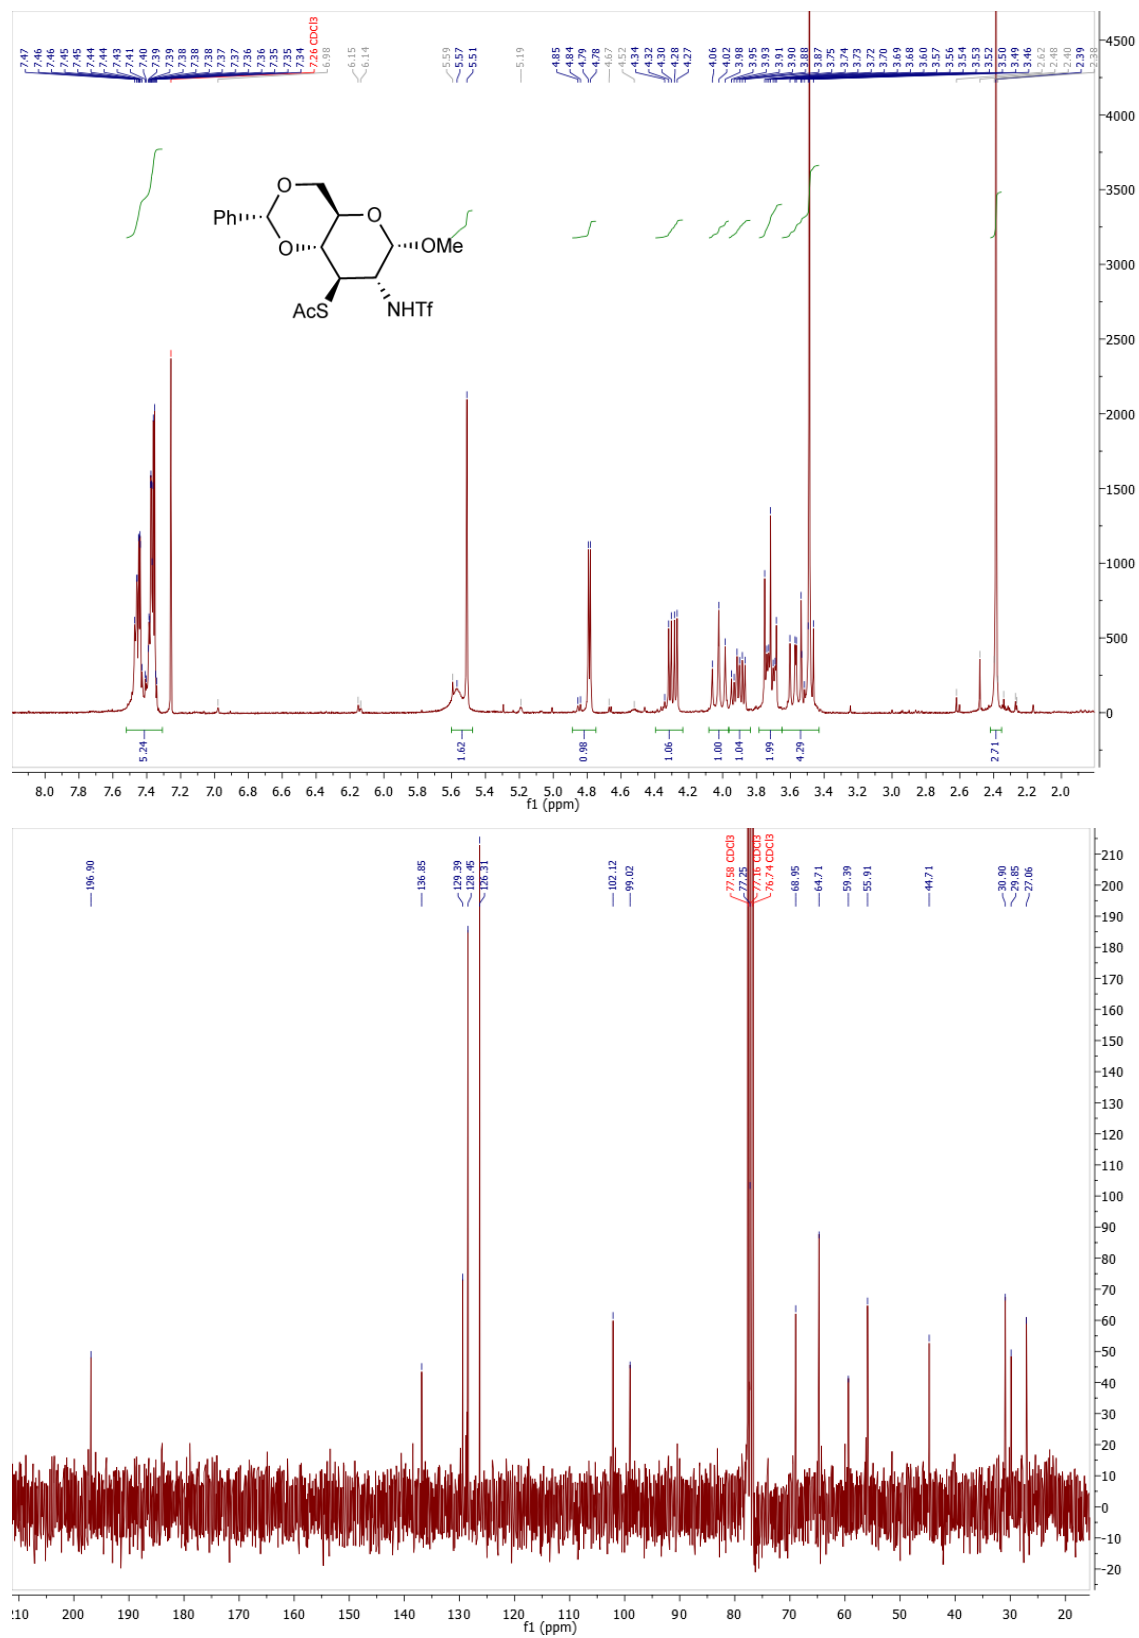

**Fig. S25.** <sup>1</sup>H NMR and <sup>13</sup>C NMR Spectrum of Compound **30**

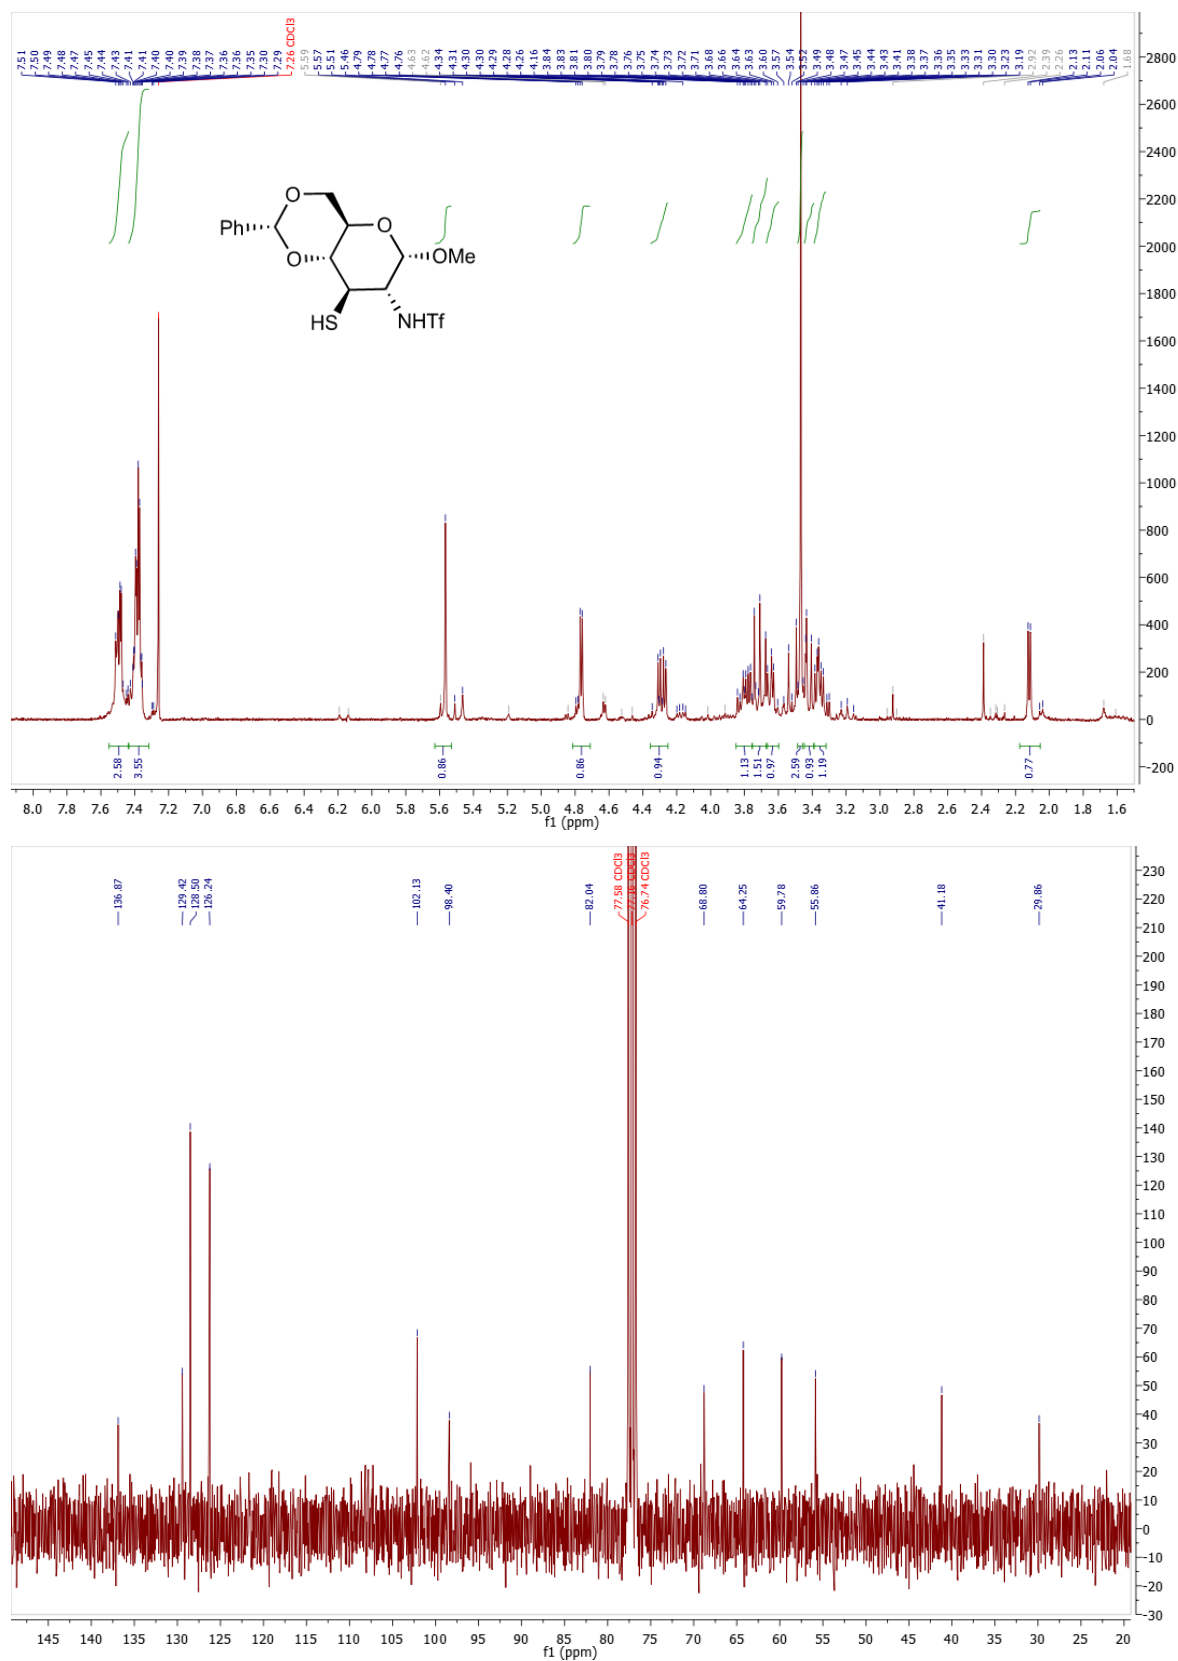

**Fig. S26.** <sup>1</sup>H NMR and <sup>13</sup>C NMR Spectrum of Compound **31**
